# Supplementary material for: On the influence of exact exchange on transition metal superatoms
Source: Royal Society of Chemistry journal article supplement (doi:10.1039/c9cp04229f), 2019-11-28
Supplement: c9cp04229f1.pdf [file c9cp04229f1.pdf]

## On the influence of exact exchange on transition metal superatoms - Supplementary Information

J. Gilmour and N. Gaston\*

*The MacDiarmid Institute for Advanced Materials and Nanotechnology,  
The Department of Physics, The University of Auckland,  
Private Bag 92019 Auckland 1142, New Zealand*

## I. PROJECTED DENSITY OF STATES

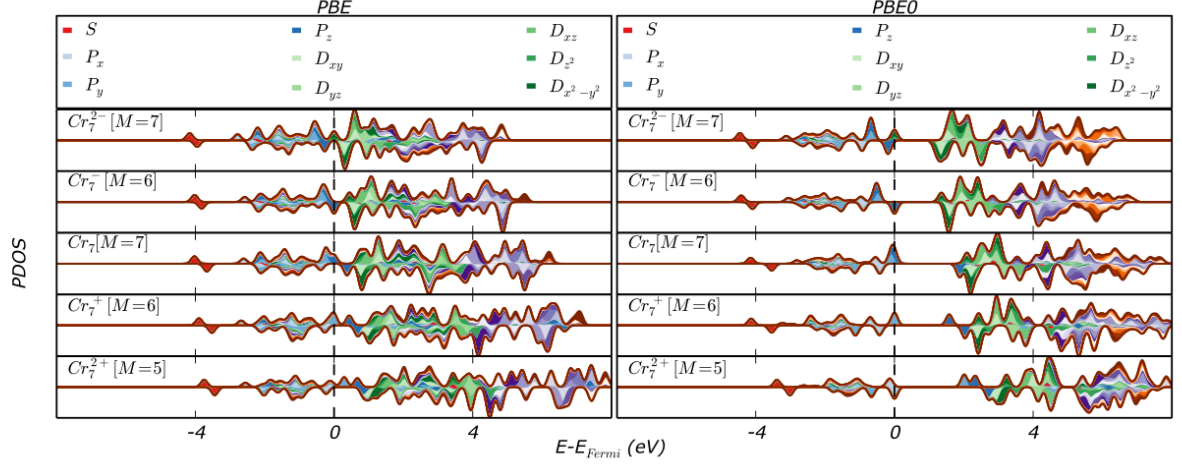

FIG. 1. Projected local density of states for the  $\text{Cr}_7^c$  ( $c = 0, \pm 1, \pm 2$ ) cluster for the PBE and PBE0 exchange-correlation functionals. The positive values present the projection values for the spin up Kohn-Sham states and the negative values present the projection values for the spin down Kohn-Sham states. The x axis for this plot is the energy of the states relative to the Fermi energy given in electron Volts. Accompanying each plot is a label of the cluster charge, with the net multiplicity given in square brackets.

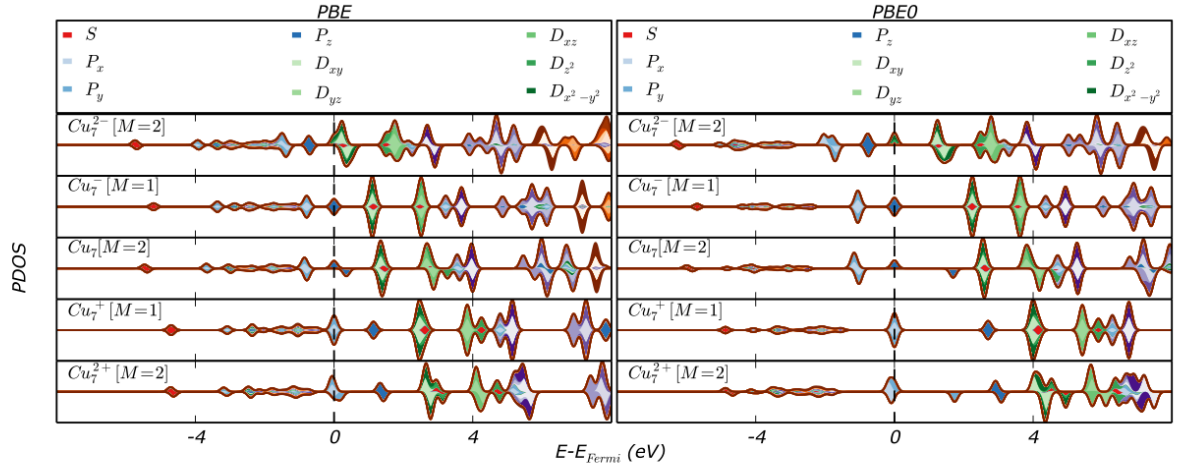

FIG. 2. Projected local density of states for the  $\text{Cu}_7^c$  ( $c = 0, \pm 1, \pm 2$ ) cluster for the PBE and PBE0 exchange-correlation functionals. The positive values present the projection values for the spin up Kohn-Sham states and the negative values present the projection values for the spin down Kohn-Sham states. The x axis for this plot is the energy of the states relative to the Fermi energy given in electron Volts. Accompanying each plot is a label of the cluster charge, with the net multiplicity given in square brackets.

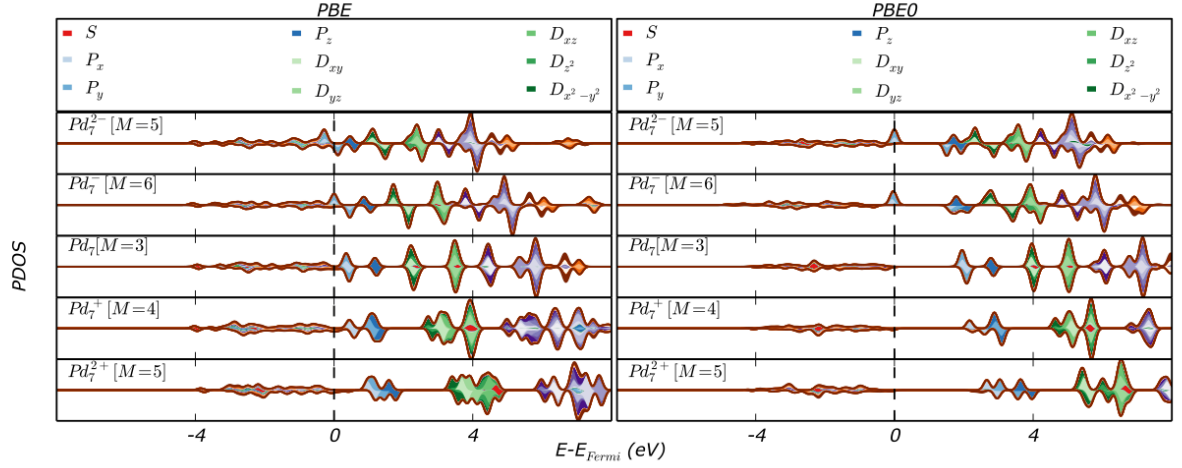

FIG. 3. Projected local density of states for the  $\text{Pd}_7^c$  ( $c = 0, \pm 1, \pm 2$ ) cluster for the PBE and PBE0 exchange-correlation functionals. The positive values present the projection values for the spin up Kohn-Sham states and the negative values present the projection values for the spin down Kohn-Sham states. The x axis for this plot is the energy of the states relative to the Fermi energy given in electron Volts. Accompanying each plot is a label of the cluster charge, with the net multiplicity given in square brackets.

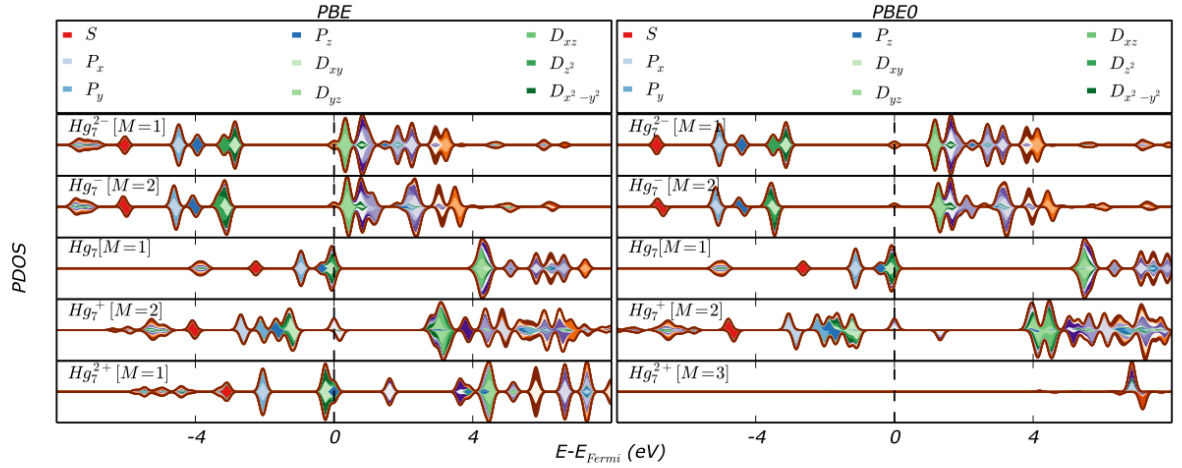

FIG. 4. Projected local density of states for the  $\text{Hg}_7^c$  ( $c = 0, \pm 1, \pm 2$ ) cluster for the PBE and PBE0 exchange-correlation functionals. The positive values present the projection values for the spin up Kohn-Sham states and the negative values present the projection values for the spin down Kohn-Sham states. The x axis for this plot is the energy of the states relative to the Fermi energy given in electron Volts. Accompanying each plot is a label of the cluster charge, with the net multiplicity given in square brackets.



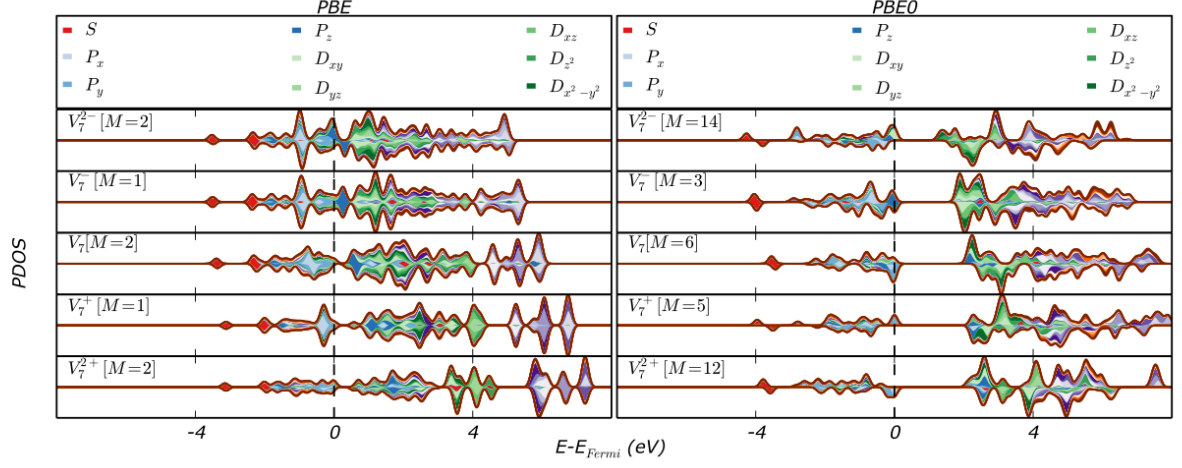

FIG. 5. Projected local density of states for the  $V_7^c$  ( $c = 0, \pm 1, \pm 2$ ) cluster for the PBE and PBE0 exchange-correlation functionals. The positive values present the projection values for the spin up Kohn-Sham states and the negative values present the projection values for the spin down Kohn-Sham states. The x axis for this plot is the energy of the states relative to the Fermi energy given in electron Volts. Accompanying each plot is a label of the cluster charge, with the net multiplicity given in square brackets.

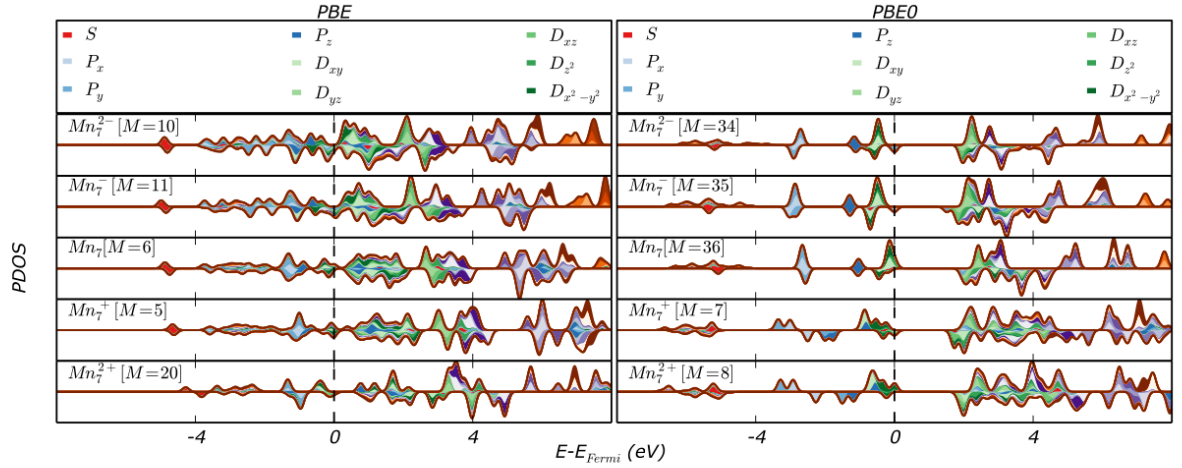

FIG. 6. Projected local density of states for the  $Mn_7^c$  ( $c = 0, \pm 1, \pm 2$ ) cluster for the PBE and PBE0 exchange-correlation functionals. The positive values present the projection values for the spin up Kohn-Sham states and the negative values present the projection values for the spin down Kohn-Sham states. The x axis for this plot is the energy of the states relative to the Fermi energy given in electron Volts. Accompanying each plot is a label of the cluster charge, with the net multiplicity given in square brackets.

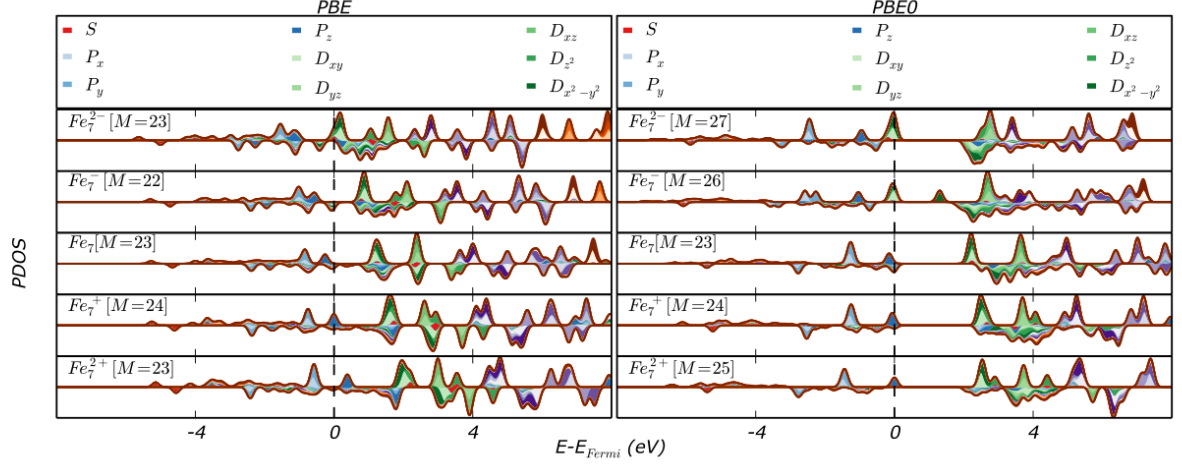

FIG. 7. Projected local density of states for the  $\text{Fe}_7^c$  ( $c = 0, \pm 1, \pm 2$ ) cluster for the PBE and PBE0 exchange-correlation functionals. The positive values present the projection values for the spin up Kohn-Sham states and the negative values present the projection values for the spin down Kohn-Sham states. The x axis for this plot is the energy of the states relative to the Fermi energy given in electron Volts. Accompanying each plot is a label of the cluster charge, with the net multiplicity given in square brackets.

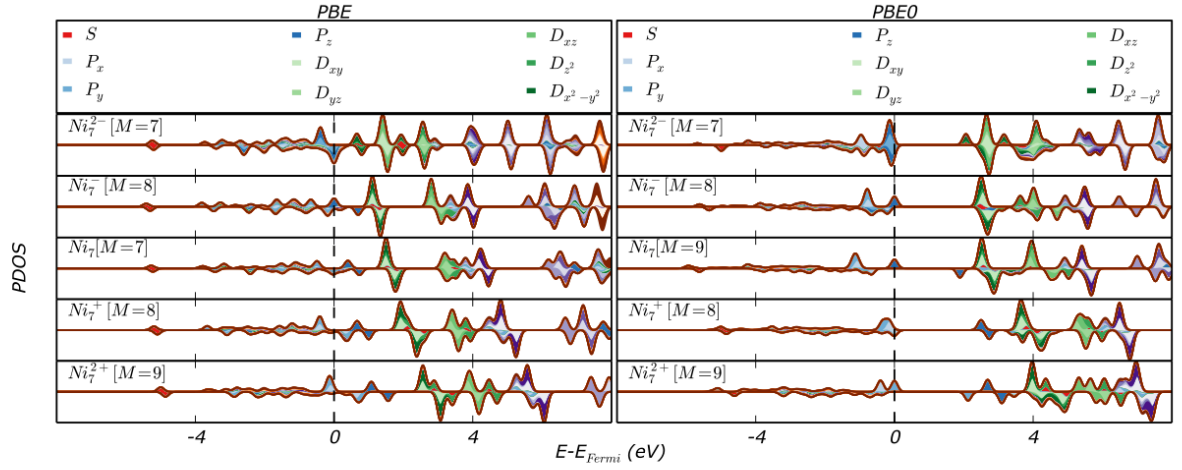

FIG. 8. Projected local density of states for the  $\text{Ni}_7^c$  ( $c = 0, \pm 1, \pm 2$ ) cluster for the PBE and PBE0 exchange-correlation functionals. The positive values present the projection values for the spin up Kohn-Sham states and the negative values present the projection values for the spin down Kohn-Sham states. The x axis for this plot is the energy of the states relative to the Fermi energy given in electron Volts. Accompanying each plot is a label of the cluster charge, with the net multiplicity given in square brackets.

## II. PBE PROJECTED LOCAL DENSITY OF STATES

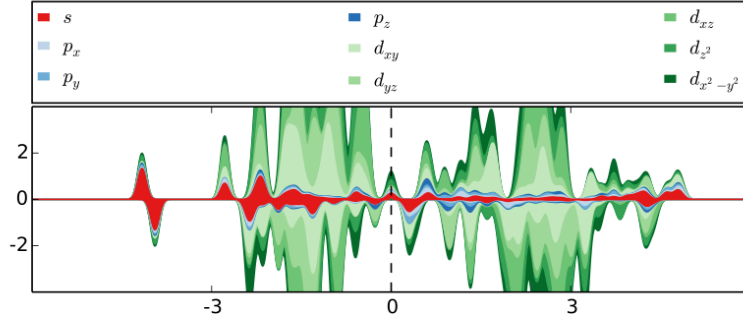

FIG. 9. Projected local density of states for the  $\text{Cr}_7^{2-}$  cluster with a multiplicity of 7 for the PBE exchange-correlation functional. The positive values present the projection values for the spin up Kohn-Sham states and the negative values present the projection values for the spin down Kohn-Sham states. The x axis for this plot is the energy of the states relative to the Fermi energy given in electron Volts.

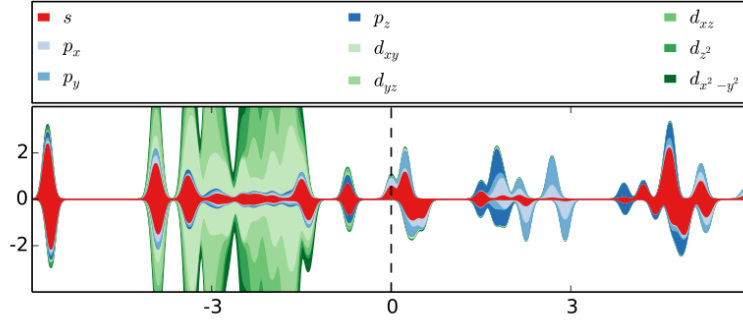

FIG. 10. Projected local density of states for the  $\text{Cu}_7^{2-}$  cluster with a multiplicity of 2 for the PBE exchange-correlation functional. The positive values present the projection values for the spin up Kohn-Sham states and the negative values present the projection values for the spin down Kohn-Sham states. The x axis for this plot is the energy of the states relative to the Fermi energy given in electron Volts.

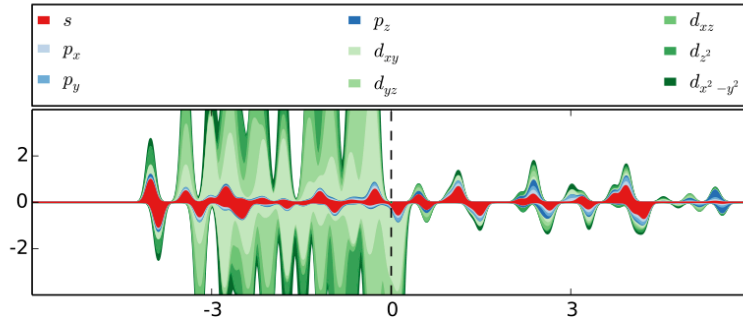

FIG. 11. Projected local density of states for the  $\text{Pd}_7^{2-}$  cluster with a multiplicity of 5 for the PBE exchange-correlation functional. The positive values present the projection values for the spin up Kohn-Sham states and the negative values present the projection values for the spin down Kohn-Sham states. The x axis for this plot is the energy of the states relative to the Fermi energy given in electron Volts.

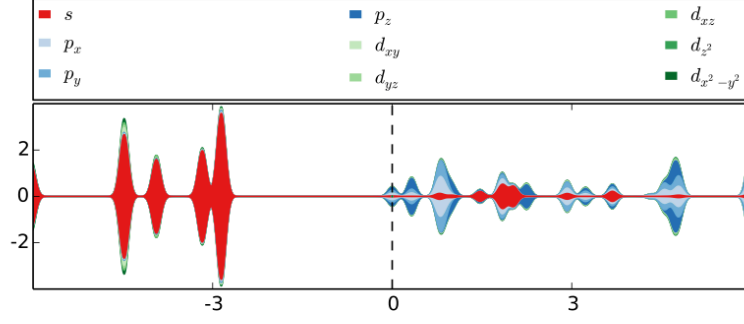

FIG. 12. Projected local density of states for the  $\text{Hg}_7^{2-}$  cluster with a multiplicity of 1 for the PBE exchange-correlation functional. The positive values present the projection values for the spin up Kohn-Sham states and the negative values present the projection values for the spin down Kohn-Sham states. The x axis for this plot is the energy of the states relative to the Fermi energy given in electron Volts.

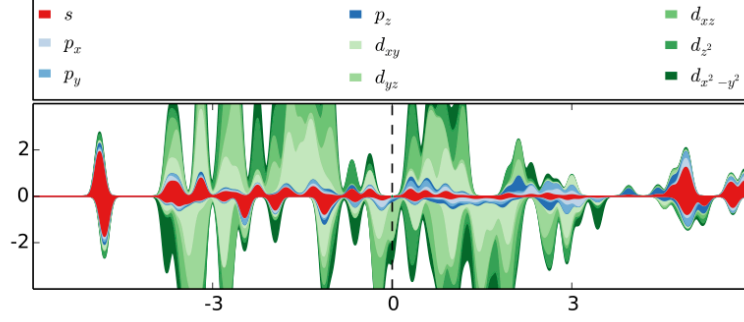

FIG. 13. Projected local density of states for the  $\text{Mn}_7^{2-}$  cluster with a multiplicity of 10 for the PBE exchange-correlation functional. The positive values present the projection values for the spin up Kohn-Sham states and the negative values present the projection values for the spin down Kohn-Sham states. The x axis for this plot is the energy of the states relative to the Fermi energy given in electron Volts.

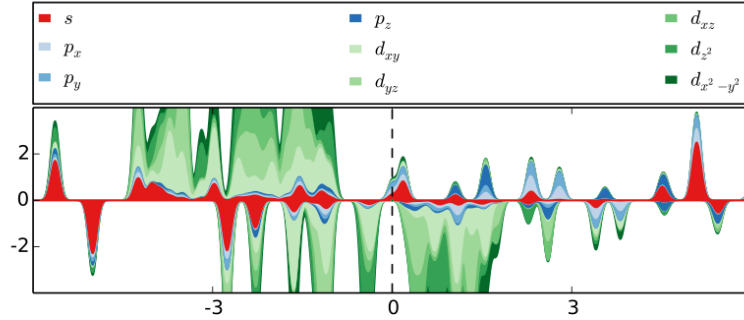

FIG. 14. Projected local density of states for the  $\text{Fe}_7^{2-}$  cluster with a multiplicity of 23 for the PBE exchange-correlation functional. The positive values present the projection values for the spin up Kohn-Sham states and the negative values present the projection values for the spin down Kohn-Sham states. The x axis for this plot is the energy of the states relative to the Fermi energy given in electron Volts.

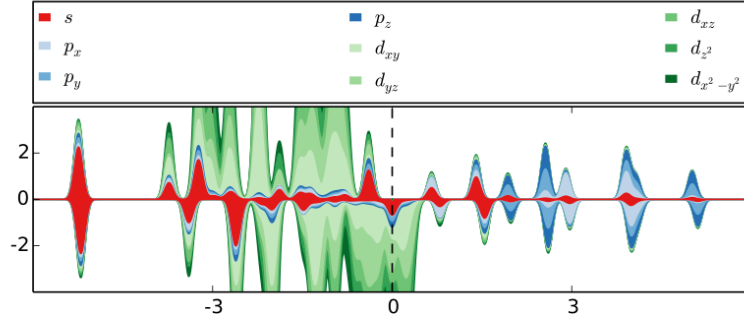

FIG. 15. Projected local density of states for the  $\text{Ni}_7^{2-}$  cluster with a multiplicity of 7 for the PBE exchange-correlation functional. The positive values present the projection values for the spin up Kohn-Sham states and the negative values present the projection values for the spin down Kohn-Sham states. The x axis for this plot is the energy of the states relative to the Fermi energy given in electron Volts.

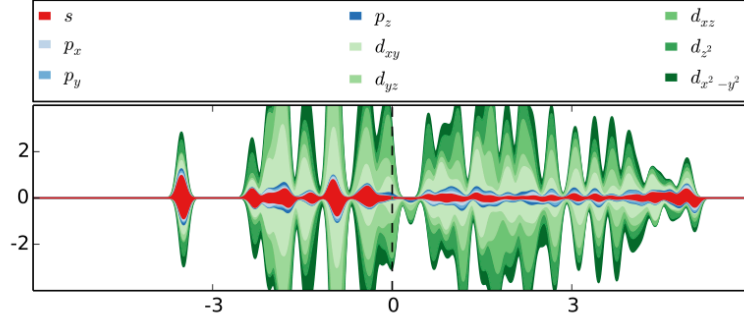

FIG. 16. Projected local density of states for the  $\text{V}_7^{2-}$  cluster with a multiplicity of 2 for the PBE exchange-correlation functional. The positive values present the projection values for the spin up Kohn-Sham states and the negative values present the projection values for the spin down Kohn-Sham states. The x axis for this plot is the energy of the states relative to the Fermi energy given in electron Volts.

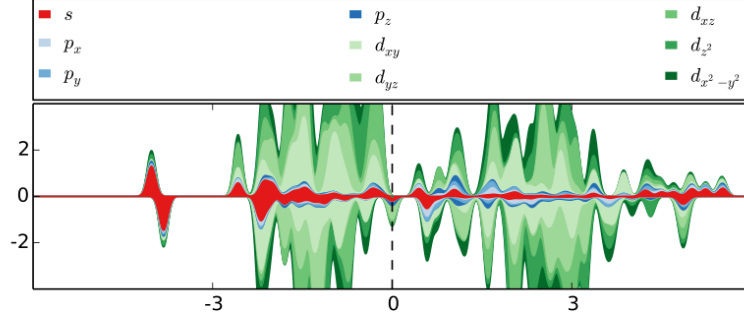

FIG. 17. Projected local density of states for the  $\text{Cr}_7^-$  cluster with a multiplicity of 6 for the PBE exchange-correlation functional. The positive values present the projection values for the spin up Kohn-Sham states and the negative values present the projection values for the spin down Kohn-Sham states. The x axis for this plot is the energy of the states relative to the Fermi energy given in electron Volts.

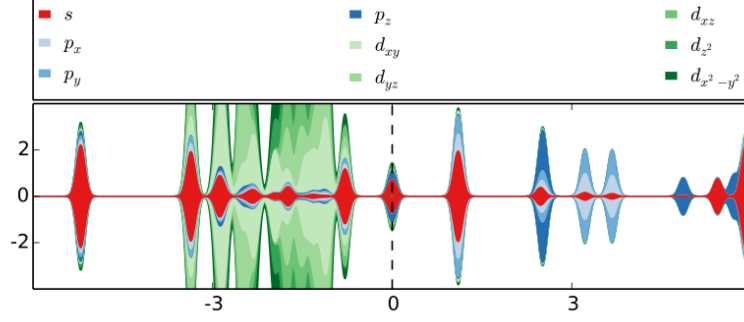

FIG. 18. Projected local density of states for the  $\text{Cu}_7^-$  cluster with a multiplicity of 1 for the PBE exchange-correlation functional. The positive values present the projection values for the spin up Kohn-Sham states and the negative values present the projection values for the spin down Kohn-Sham states. The x axis for this plot is the energy of the states relative to the Fermi energy given in electron Volts.

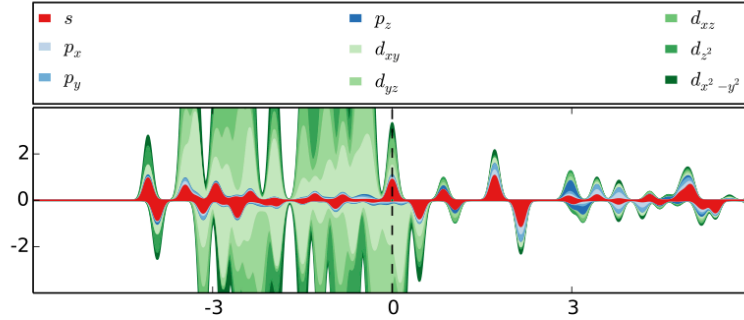

FIG. 19. Projected local density of states for the  $\text{Pd}_7^-$  cluster with a multiplicity of 6 for the PBE exchange-correlation functional. The positive values present the projection values for the spin up Kohn-Sham states and the negative values present the projection values for the spin down Kohn-Sham states. The x axis for this plot is the energy of the states relative to the Fermi energy given in electron Volts.

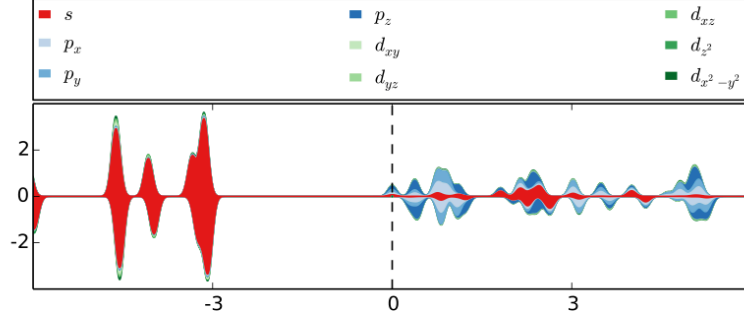

FIG. 20. Projected local density of states for the  $\text{Hg}_7^-$  cluster with a multiplicity of 2 for the PBE exchange-correlation functional. The positive values present the projection values for the spin up Kohn-Sham states and the negative values present the projection values for the spin down Kohn-Sham states. The x axis for this plot is the energy of the states relative to the Fermi energy given in electron Volts.

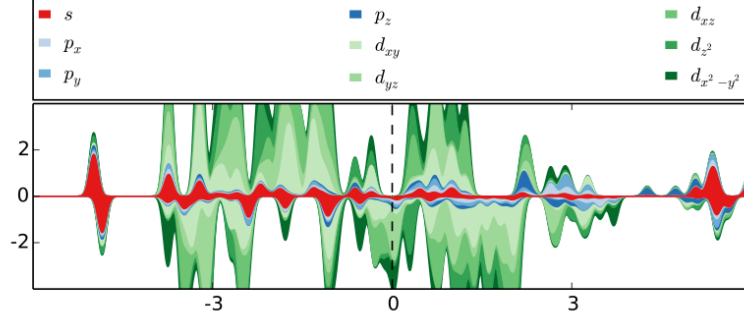

FIG. 21. Projected local density of states for the  $\text{Mn}_7^-$  cluster with a multiplicity of 11 for the PBE exchange-correlation functional. The positive values present the projection values for the spin up Kohn-Sham states and the negative values present the projection values for the spin down Kohn-Sham states. The x axis for this plot is the energy of the states relative to the Fermi energy given in electron Volts.

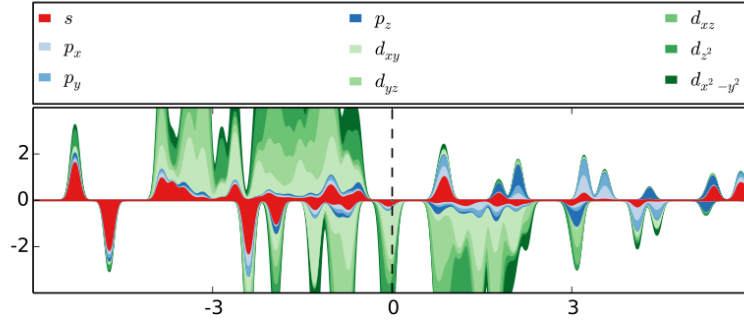

FIG. 22. Projected local density of states for the  $\text{Fe}_7^-$  cluster with a multiplicity of 22 for the PBE exchange-correlation functional. The positive values present the projection values for the spin up Kohn-Sham states and the negative values present the projection values for the spin down Kohn-Sham states. The x axis for this plot is the energy of the states relative to the Fermi energy given in electron Volts.



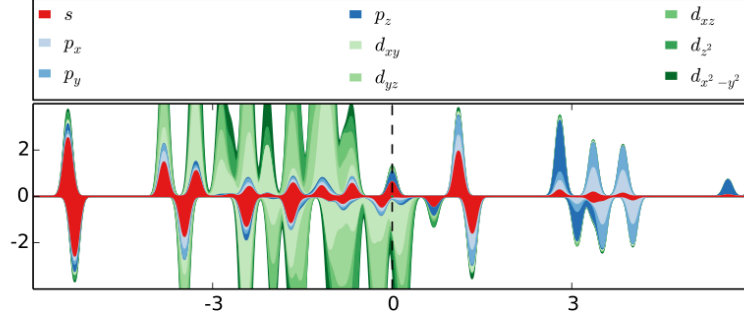

FIG. 23. Projected local density of states for the  $\text{Ni}_7^-$  cluster with a multiplicity of 8 for the PBE exchange-correlation functional. The positive values present the projection values for the spin up Kohn-Sham states and the negative values present the projection values for the spin down Kohn-Sham states. The x axis for this plot is the energy of the states relative to the Fermi energy given in electron Volts.

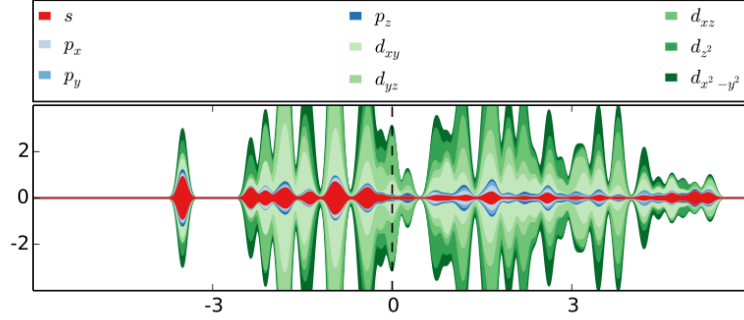

FIG. 24. Projected local density of states for the  $\text{V}_7^-$  cluster with a multiplicity of 1 for the PBE exchange-correlation functional. The positive values present the projection values for the spin up Kohn-Sham states and the negative values present the projection values for the spin down Kohn-Sham states. The x axis for this plot is the energy of the states relative to the Fermi energy given in electron Volts.

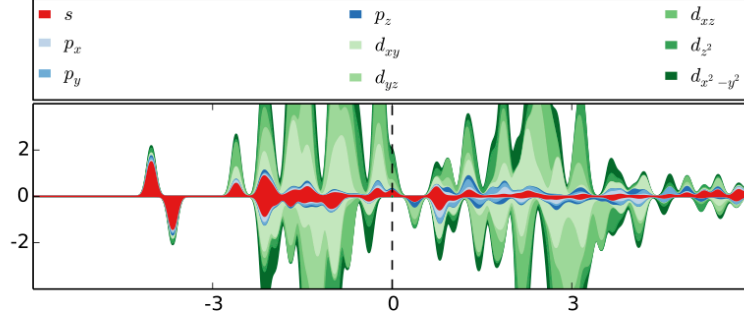

FIG. 25. Projected local density of states for the Cr<sub>7</sub> cluster with a multiplicity of 7 for the PBE exchange-correlation functional. The positive values present the projection values for the spin up Kohn-Sham states and the negative values present the projection values for the spin down Kohn-Sham states. The x axis for this plot is the energy of the states relative to the Fermi energy given in electron Volts.

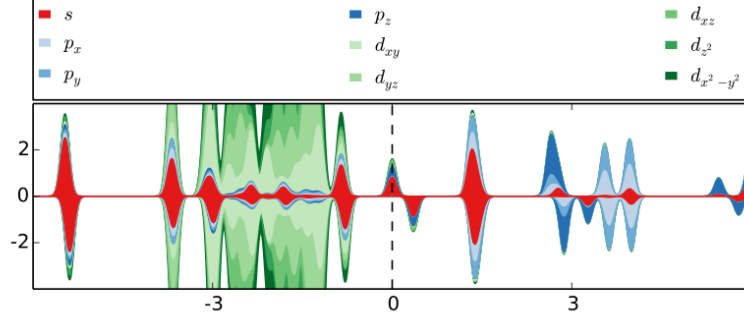

FIG. 26. Projected local density of states for the Cu<sub>7</sub> cluster with a multiplicity of 2 for the PBE exchange-correlation functional. The positive values present the projection values for the spin up Kohn-Sham states and the negative values present the projection values for the spin down Kohn-Sham states. The x axis for this plot is the energy of the states relative to the Fermi energy given in electron Volts.

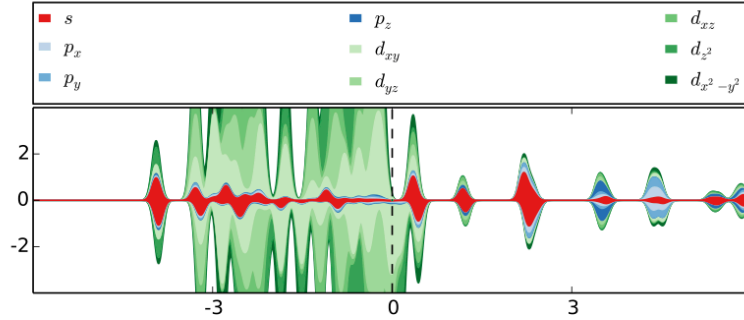

FIG. 27. Projected local density of states for the Pd<sub>7</sub> cluster with a multiplicity of 3 for the PBE exchange-correlation functional. The positive values present the projection values for the spin up Kohn-Sham states and the negative values present the projection values for the spin down Kohn-Sham states. The x axis for this plot is the energy of the states relative to the Fermi energy given in electron Volts.

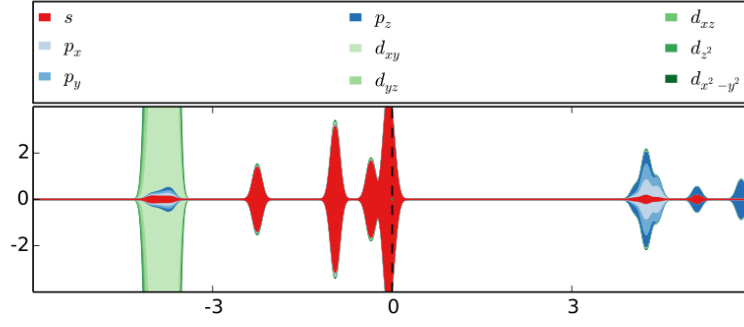

FIG. 28. Projected local density of states for the Hg<sub>7</sub> cluster with a multiplicity of 1 for the PBE exchange-correlation functional. The positive values present the projection values for the spin up Kohn-Sham states and the negative values present the projection values for the spin down Kohn-Sham states. The x axis for this plot is the energy of the states relative to the Fermi energy given in electron Volts.

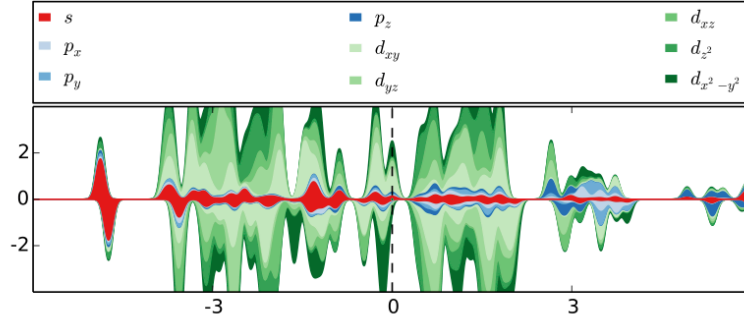

FIG. 29. Projected local density of states for the Mn<sub>7</sub> cluster with a multiplicity of 6 for the PBE exchange-correlation functional. The positive values present the projection values for the spin up Kohn-Sham states and the negative values present the projection values for the spin down Kohn-Sham states. The x axis for this plot is the energy of the states relative to the Fermi energy given in electron Volts.

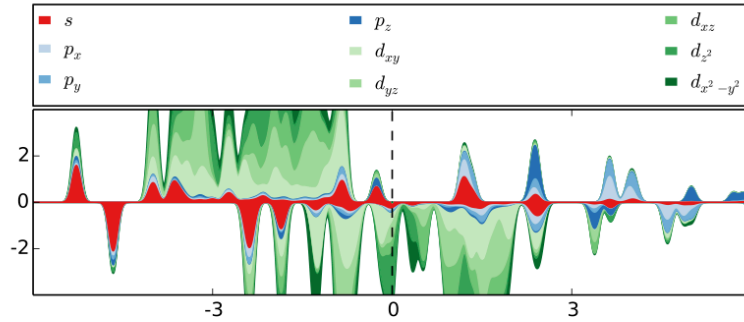

FIG. 30. Projected local density of states for the Fe<sub>7</sub> cluster with a multiplicity of 23 for the PBE exchange-correlation functional. The positive values present the projection values for the spin up Kohn-Sham states and the negative values present the projection values for the spin down Kohn-Sham states. The x axis for this plot is the energy of the states relative to the Fermi energy given in electron Volts.

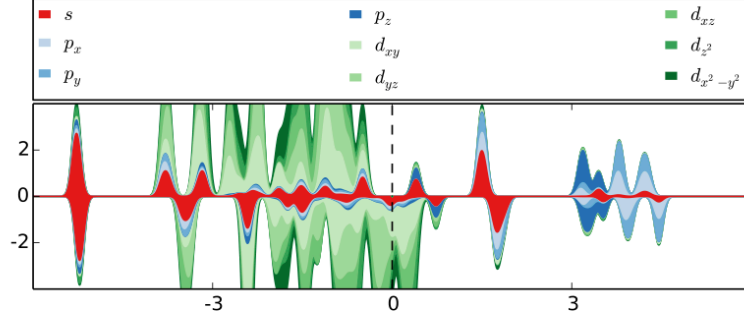

FIG. 31. Projected local density of states for the Ni<sub>7</sub> cluster with a multiplicity of 7 for the PBE exchange-correlation functional. The positive values present the projection values for the spin up Kohn-Sham states and the negative values present the projection values for the spin down Kohn-Sham states. The x axis for this plot is the energy of the states relative to the Fermi energy given in electron Volts.

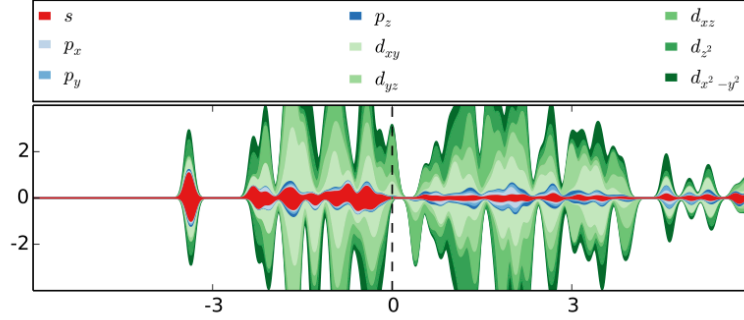

FIG. 32. Projected local density of states for the V<sub>7</sub> cluster with a multiplicity of 2 for the PBE exchange-correlation functional. The positive values present the projection values for the spin up Kohn-Sham states and the negative values present the projection values for the spin down Kohn-Sham states. The x axis for this plot is the energy of the states relative to the Fermi energy given in electron Volts.

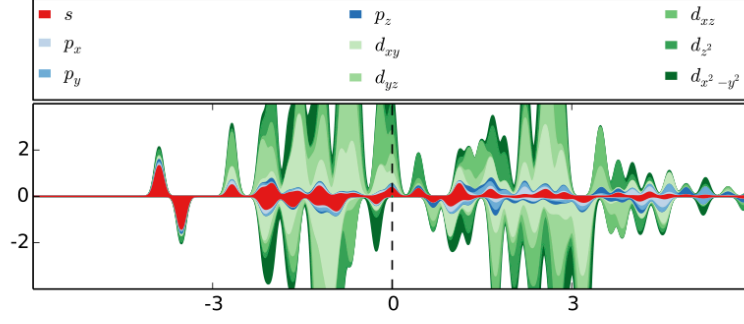

FIG. 33. Projected local density of states for the  $\text{Cr}_7^+$  cluster with a multiplicity of 6 for the PBE exchange-correlation functional. The positive values present the projection values for the spin up Kohn-Sham states and the negative values present the projection values for the spin down Kohn-Sham states. The x axis for this plot is the energy of the states relative to the Fermi energy given in electron Volts.

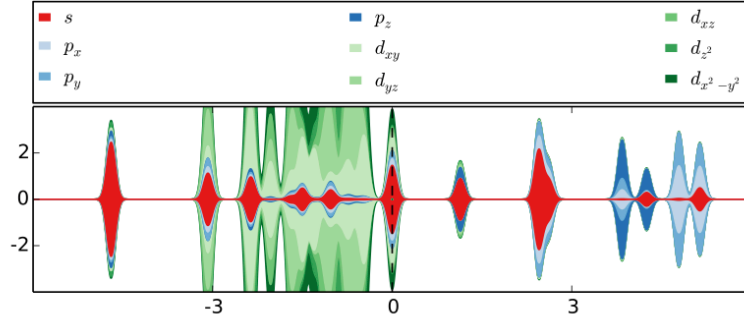

FIG. 34. Projected local density of states for the  $\text{Cu}_7^+$  cluster with a multiplicity of 1 for the PBE exchange-correlation functional. The positive values present the projection values for the spin up Kohn-Sham states and the negative values present the projection values for the spin down Kohn-Sham states. The x axis for this plot is the energy of the states relative to the Fermi energy given in electron Volts.

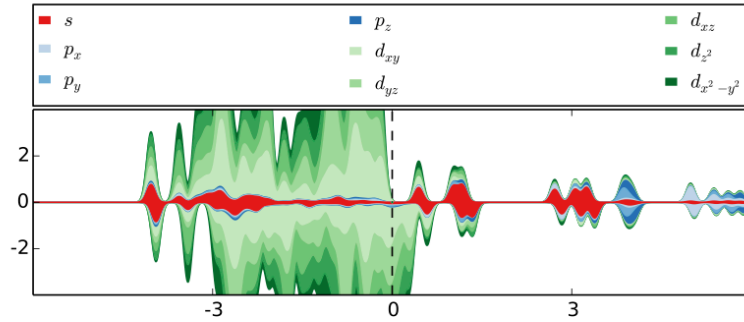

FIG. 35. Projected local density of states for the  $\text{Pd}_7^+$  cluster with a multiplicity of 4 for the PBE exchange-correlation functional. The positive values present the projection values for the spin up Kohn-Sham states and the negative values present the projection values for the spin down Kohn-Sham states. The x axis for this plot is the energy of the states relative to the Fermi energy given in electron Volts.

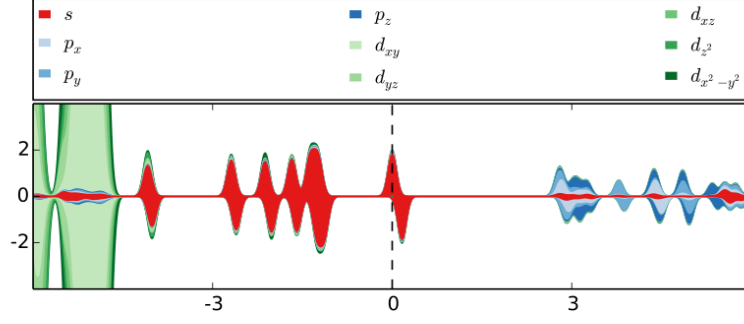

FIG. 36. Projected local density of states for the  $\text{Hg}_7^+$  cluster with a multiplicity of 2 for the PBE exchange-correlation functional. The positive values present the projection values for the spin up Kohn-Sham states and the negative values present the projection values for the spin down Kohn-Sham states. The x axis for this plot is the energy of the states relative to the Fermi energy given in electron Volts.

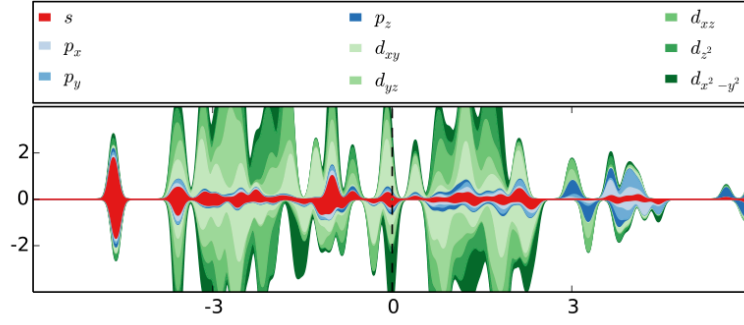

FIG. 37. Projected local density of states for the  $\text{Mn}_7^+$  cluster with a multiplicity of 5 for the PBE exchange-correlation functional. The positive values present the projection values for the spin up Kohn-Sham states and the negative values present the projection values for the spin down Kohn-Sham states. The x axis for this plot is the energy of the states relative to the Fermi energy given in electron Volts.

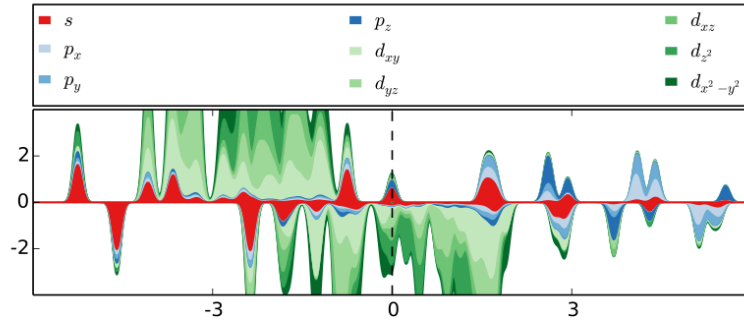

FIG. 38. Projected local density of states for the  $\text{Fe}_7^+$  cluster with a multiplicity of 24 for the PBE exchange-correlation functional. The positive values present the projection values for the spin up Kohn-Sham states and the negative values present the projection values for the spin down Kohn-Sham states. The x axis for this plot is the energy of the states relative to the Fermi energy given in electron Volts.

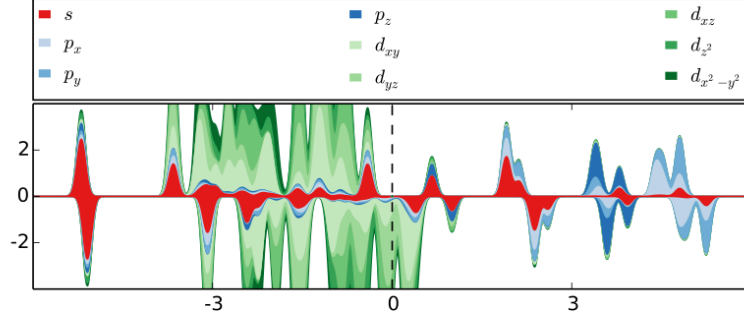

FIG. 39. Projected local density of states for the  $\text{Ni}_7^+$  cluster with a multiplicity of 8 for the PBE exchange-correlation functional. The positive values present the projection values for the spin up Kohn-Sham states and the negative values present the projection values for the spin down Kohn-Sham states. The x axis for this plot is the energy of the states relative to the Fermi energy given in electron Volts.

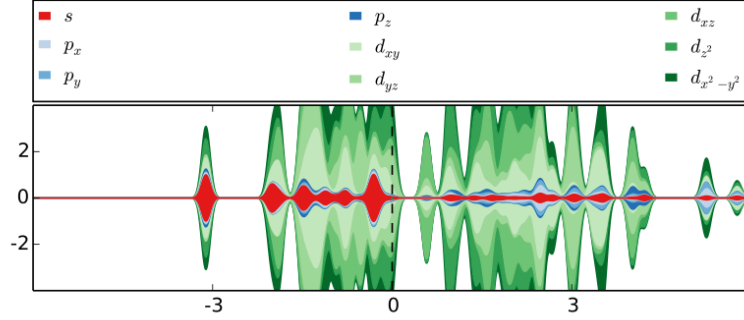

FIG. 40. Projected local density of states for the  $\text{V}_7^+$  cluster with a multiplicity of 1 for the PBE exchange-correlation functional. The positive values present the projection values for the spin up Kohn-Sham states and the negative values present the projection values for the spin down Kohn-Sham states. The x axis for this plot is the energy of the states relative to the Fermi energy given in electron Volts.

### III. PBE0 PROJECTED LOCAL DENSITY OF STATES



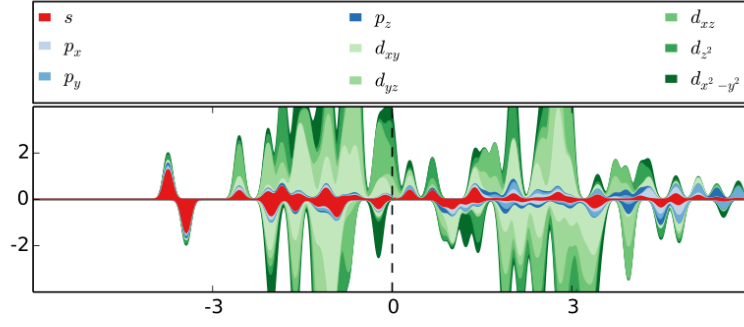

FIG. 41. Projected local density of states for the  $\text{Cr}_7^{2+}$  cluster with a multiplicity of 5 for the PBE exchange-correlation functional. The positive values present the projection values for the spin up Kohn-Sham states and the negative values present the projection values for the spin down Kohn-Sham states. The x axis for this plot is the energy of the states relative to the Fermi energy given in electron Volts.

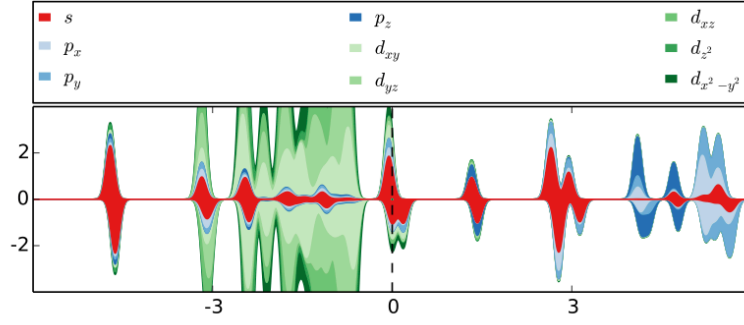

FIG. 42. Projected local density of states for the  $\text{Cu}_7^{2+}$  cluster with a multiplicity of 2 for the PBE exchange-correlation functional. The positive values present the projection values for the spin up Kohn-Sham states and the negative values present the projection values for the spin down Kohn-Sham states. The x axis for this plot is the energy of the states relative to the Fermi energy given in electron Volts.

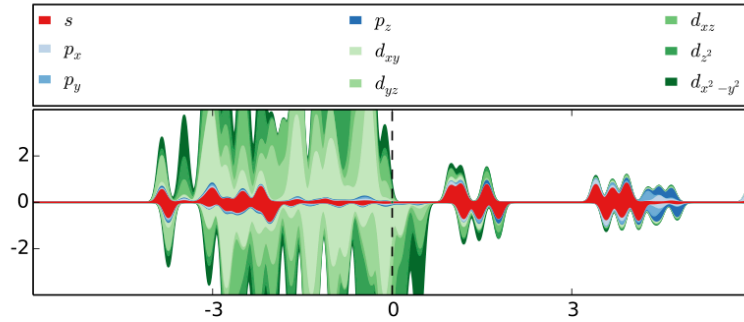

FIG. 43. Projected local density of states for the  $\text{Pd}_7^{2+}$  cluster with a multiplicity of 5 for the PBE exchange-correlation functional. The positive values present the projection values for the spin up Kohn-Sham states and the negative values present the projection values for the spin down Kohn-Sham states. The x axis for this plot is the energy of the states relative to the Fermi energy given in electron Volts.

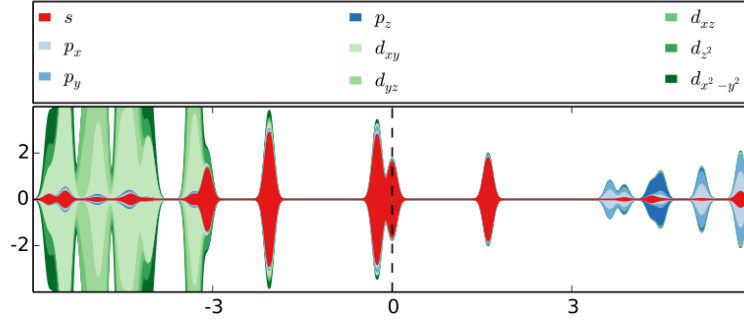

FIG. 44. Projected local density of states for the  $\text{Hg}_7^{2+}$  cluster with a multiplicity of 1 for the PBE exchange-correlation functional. The positive values present the projection values for the spin up Kohn-Sham states and the negative values present the projection values for the spin down Kohn-Sham states. The x axis for this plot is the energy of the states relative to the Fermi energy given in electron Volts.

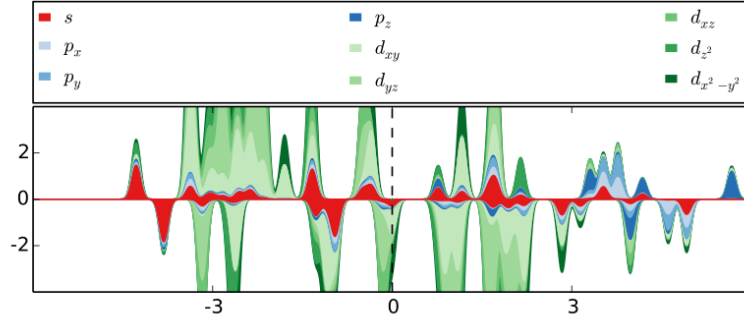

FIG. 45. Projected local density of states for the  $\text{Mn}_7^{2+}$  cluster with a multiplicity of 20 for the PBE exchange-correlation functional. The positive values present the projection values for the spin up Kohn-Sham states and the negative values present the projection values for the spin down Kohn-Sham states. The x axis for this plot is the energy of the states relative to the Fermi energy given in electron Volts.

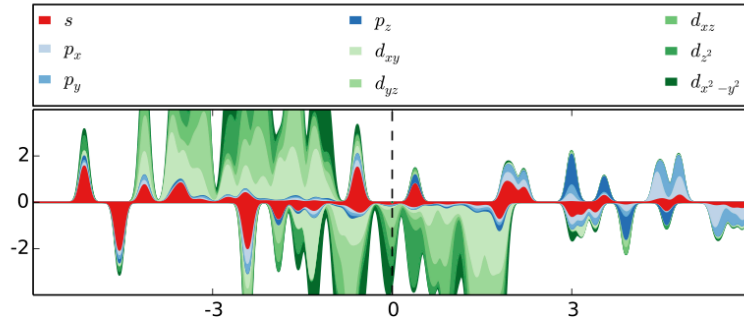

FIG. 46. Projected local density of states for the  $\text{Fe}_7^{2+}$  cluster with a multiplicity of 23 for the PBE exchange-correlation functional. The positive values present the projection values for the spin up Kohn-Sham states and the negative values present the projection values for the spin down Kohn-Sham states. The x axis for this plot is the energy of the states relative to the Fermi energy given in electron Volts.

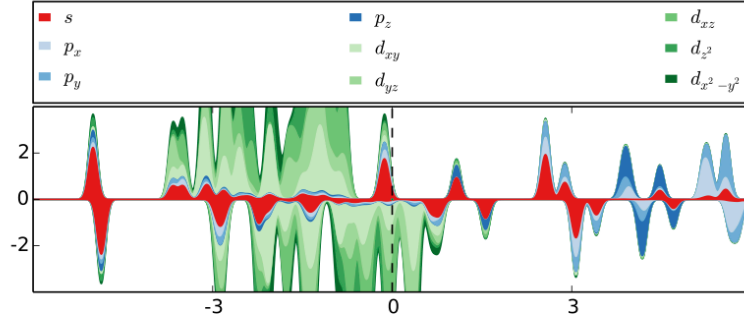

FIG. 47. Projected local density of states for the  $\text{Ni}_7^{2+}$  cluster with a multiplicity of 9 for the PBE exchange-correlation functional. The positive values present the projection values for the spin up Kohn-Sham states and the negative values present the projection values for the spin down Kohn-Sham states. The x axis for this plot is the energy of the states relative to the Fermi energy given in electron Volts.

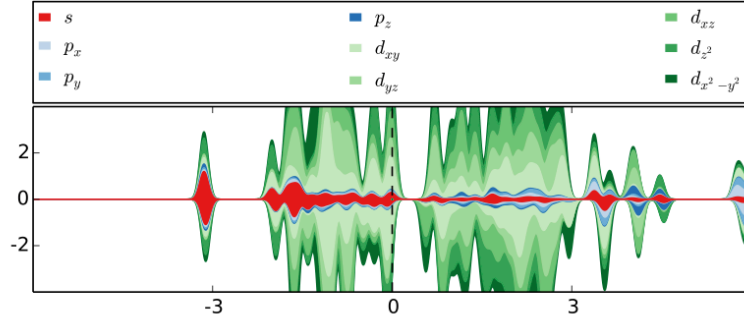

FIG. 48. Projected local density of states for the  $\text{V}_7^{2+}$  cluster with a multiplicity of 2 for the PBE exchange-correlation functional. The positive values present the projection values for the spin up Kohn-Sham states and the negative values present the projection values for the spin down Kohn-Sham states. The x axis for this plot is the energy of the states relative to the Fermi energy given in electron Volts.

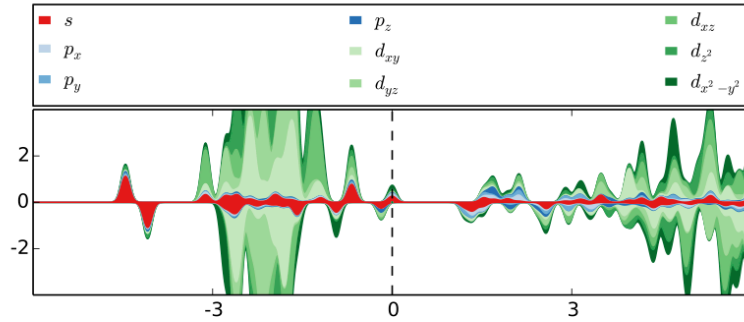

FIG. 49. Projected local density of states for the  $\text{Cr}_7^{2-}$  cluster with a multiplicity of 7 for the PBE0 exchange-correlation functional. The positive values present the projection values for the spin up Kohn-Sham states and the negative values present the projection values for the spin down Kohn-Sham states. The x axis for this plot is the energy of the states relative to the Fermi energy given in electron Volts.

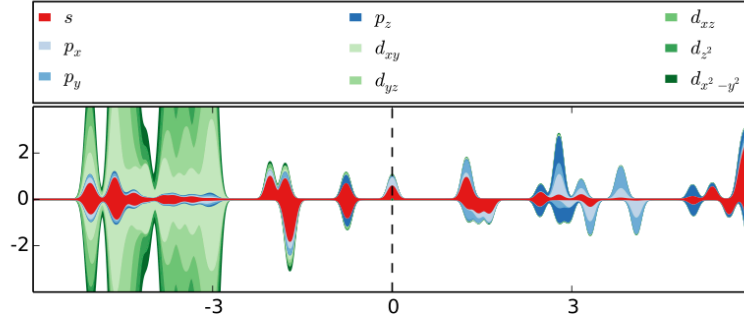

FIG. 50. Projected local density of states for the  $\text{Cu}_7^{2-}$  cluster with a multiplicity of 2 for the PBE0 exchange-correlation functional. The positive values present the projection values for the spin up Kohn-Sham states and the negative values present the projection values for the spin down Kohn-Sham states. The x axis for this plot is the energy of the states relative to the Fermi energy given in electron Volts.

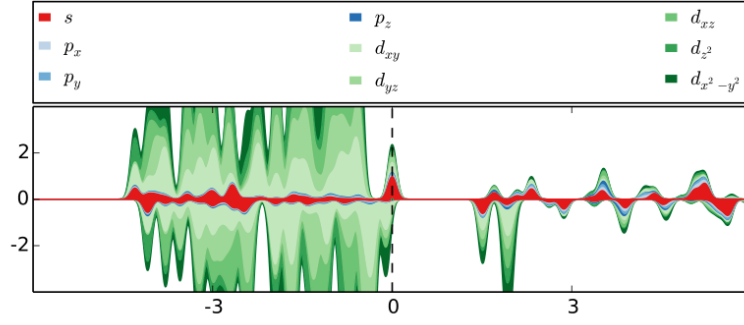

FIG. 51. Projected local density of states for the  $\text{Pd}_7^{2-}$  cluster with a multiplicity of 5 for the PBE0 exchange-correlation functional. The positive values present the projection values for the spin up Kohn-Sham states and the negative values present the projection values for the spin down Kohn-Sham states. The x axis for this plot is the energy of the states relative to the Fermi energy given in electron Volts.

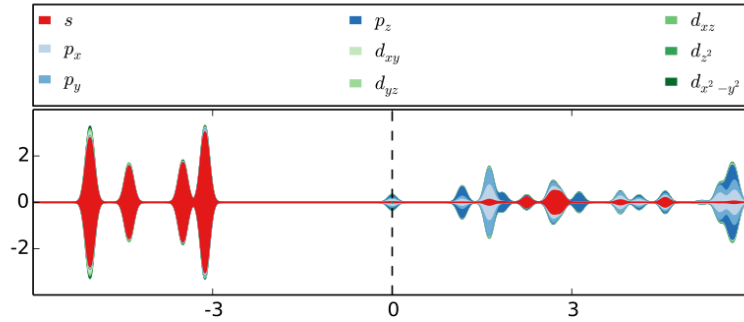

FIG. 52. Projected local density of states for the  $\text{Hg}_7^{2-}$  cluster with a multiplicity of 1 for the PBE0 exchange-correlation functional. The positive values present the projection values for the spin up Kohn-Sham states and the negative values present the projection values for the spin down Kohn-Sham states. The x axis for this plot is the energy of the states relative to the Fermi energy given in electron Volts.

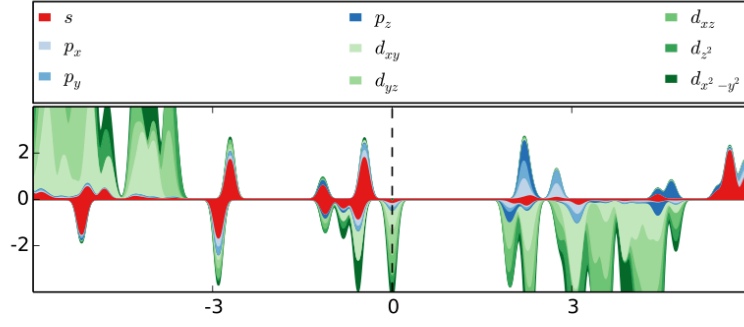

FIG. 53. Projected local density of states for the  $\text{Mn}_7^{2-}$  cluster with a multiplicity of 34 for the PBE0 exchange-correlation functional. The positive values present the projection values for the spin up Kohn-Sham states and the negative values present the projection values for the spin down Kohn-Sham states. The x axis for this plot is the energy of the states relative to the Fermi energy given in electron Volts.

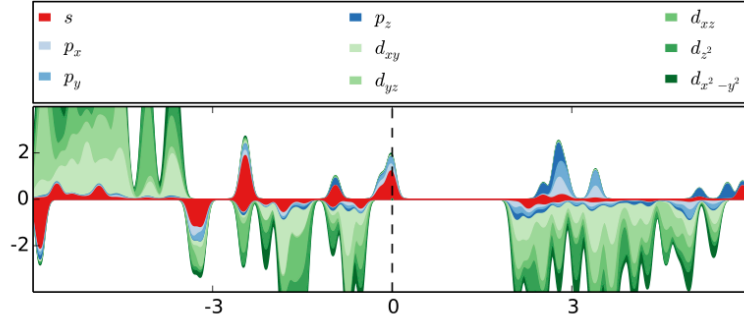

FIG. 54. Projected local density of states for the  $\text{Fe}_7^{2-}$  cluster with a multiplicity of 27 for the PBE0 exchange-correlation functional. The positive values present the projection values for the spin up Kohn-Sham states and the negative values present the projection values for the spin down Kohn-Sham states. The x axis for this plot is the energy of the states relative to the Fermi energy given in electron Volts.

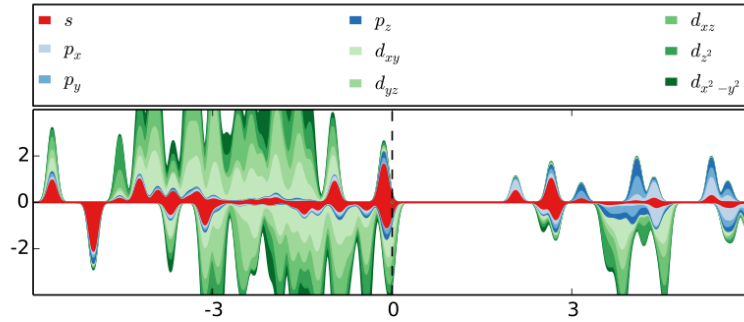

FIG. 55. Projected local density of states for the  $\text{Ni}_7^{2-}$  cluster with a multiplicity of 7 for the PBE0 exchange-correlation functional. The positive values present the projection values for the spin up Kohn-Sham states and the negative values present the projection values for the spin down Kohn-Sham states. The x axis for this plot is the energy of the states relative to the Fermi energy given in electron Volts.

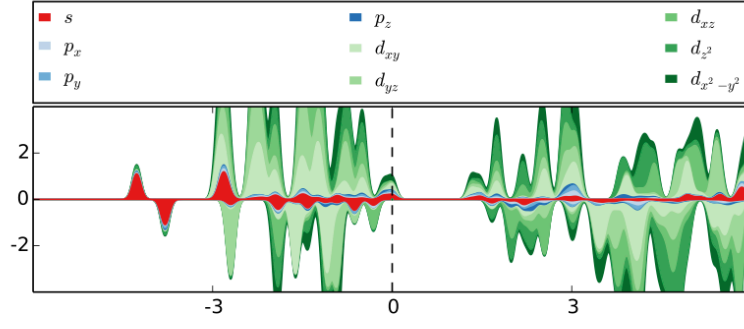

FIG. 56. Projected local density of states for the  $V_7^{2-}$  cluster with a multiplicity of 14 for the PBE0 exchange-correlation functional. The positive values present the projection values for the spin up Kohn-Sham states and the negative values present the projection values for the spin down Kohn-Sham states. The x axis for this plot is the energy of the states relative to the Fermi energy given in electron Volts.

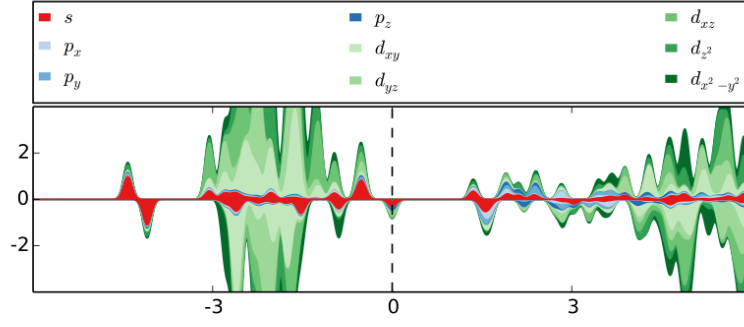

FIG. 57. Projected local density of states for the  $\text{Cr}_7^-$  cluster with a multiplicity of 6 for the PBE0 exchange-correlation functional. The positive values present the projection values for the spin up Kohn-Sham states and the negative values present the projection values for the spin down Kohn-Sham states. The x axis for this plot is the energy of the states relative to the Fermi energy given in electron Volts.

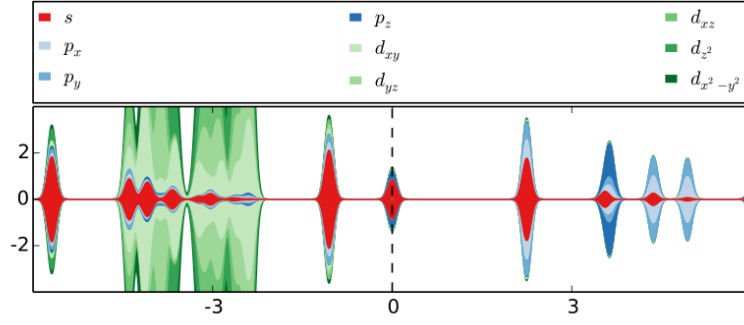

FIG. 58. Projected local density of states for the  $\text{Cu}_7^-$  cluster with a multiplicity of 1 for the PBE0 exchange-correlation functional. The positive values present the projection values for the spin up Kohn-Sham states and the negative values present the projection values for the spin down Kohn-Sham states. The x axis for this plot is the energy of the states relative to the Fermi energy given in electron Volts.

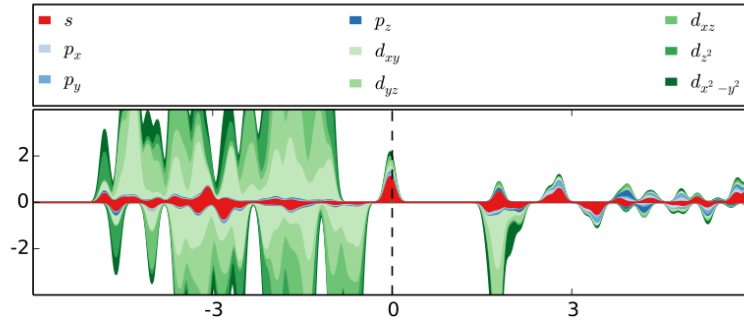

FIG. 59. Projected local density of states for the  $\text{Pd}_7^-$  cluster with a multiplicity of 6 for the PBE0 exchange-correlation functional. The positive values present the projection values for the spin up Kohn-Sham states and the negative values present the projection values for the spin down Kohn-Sham states. The x axis for this plot is the energy of the states relative to the Fermi energy given in electron Volts.

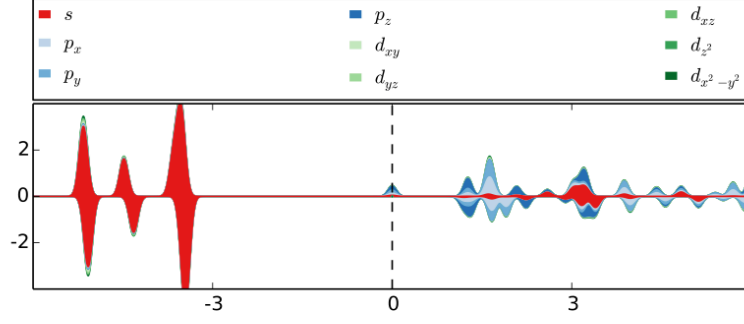

FIG. 60. Projected local density of states for the  $\text{Hg}_7^-$  cluster with a multiplicity of 2 for the PBE0 exchange-correlation functional. The positive values present the projection values for the spin up Kohn-Sham states and the negative values present the projection values for the spin down Kohn-Sham states. The x axis for this plot is the energy of the states relative to the Fermi energy given in electron Volts.

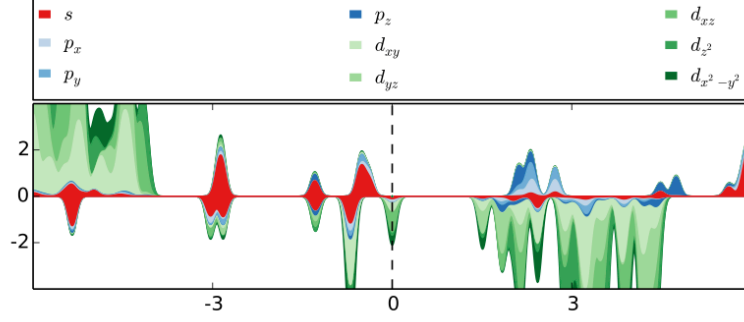

FIG. 61. Projected local density of states for the  $\text{Mn}_7^-$  cluster with a multiplicity of 35 for the PBE0 exchange-correlation functional. The positive values present the projection values for the spin up Kohn-Sham states and the negative values present the projection values for the spin down Kohn-Sham states. The x axis for this plot is the energy of the states relative to the Fermi energy given in electron Volts.

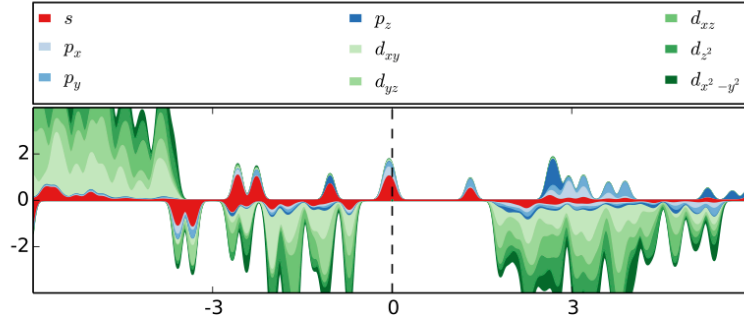

FIG. 62. Projected local density of states for the  $\text{Fe}_7^-$  cluster with a multiplicity of 26 for the PBE0 exchange-correlation functional. The positive values present the projection values for the spin up Kohn-Sham states and the negative values present the projection values for the spin down Kohn-Sham states. The x axis for this plot is the energy of the states relative to the Fermi energy given in electron Volts.



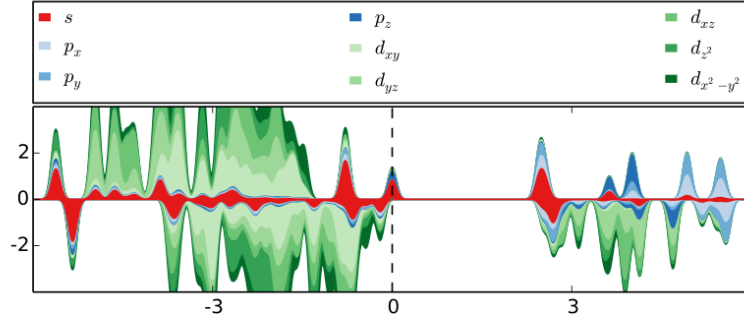

FIG. 63. Projected local density of states for the  $\text{Ni}_7^-$  cluster with a multiplicity of 8 for the PBE0 exchange-correlation functional. The positive values present the projection values for the spin up Kohn-Sham states and the negative values present the projection values for the spin down Kohn-Sham states. The x axis for this plot is the energy of the states relative to the Fermi energy given in electron Volts.

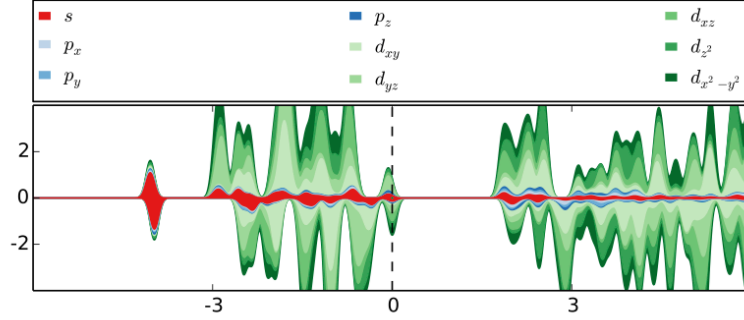

FIG. 64. Projected local density of states for the  $\text{V}_7^-$  cluster with a multiplicity of 3 for the PBE0 exchange-correlation functional. The positive values present the projection values for the spin up Kohn-Sham states and the negative values present the projection values for the spin down Kohn-Sham states. The x axis for this plot is the energy of the states relative to the Fermi energy given in electron Volts.

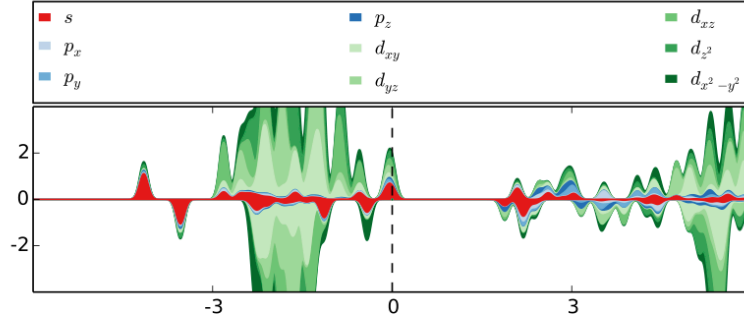

FIG. 65. Projected local density of states for the Cr<sub>7</sub> cluster with a multiplicity of 7 for the PBE0 exchange-correlation functional. The positive values present the projection values for the spin up Kohn-Sham states and the negative values present the projection values for the spin down Kohn-Sham states. The x axis for this plot is the energy of the states relative to the Fermi energy given in electron Volts.

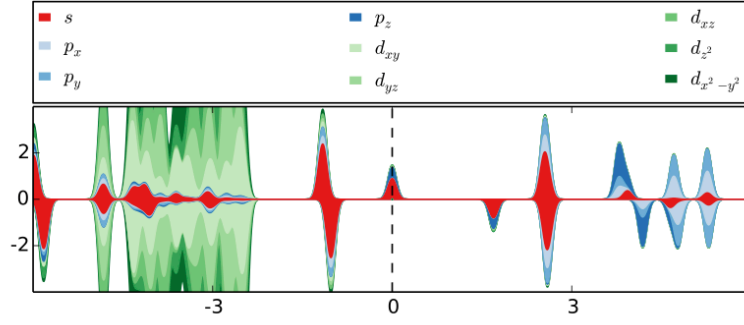

FIG. 66. Projected local density of states for the Cu<sub>7</sub> cluster with a multiplicity of 2 for the PBE0 exchange-correlation functional. The positive values present the projection values for the spin up Kohn-Sham states and the negative values present the projection values for the spin down Kohn-Sham states. The x axis for this plot is the energy of the states relative to the Fermi energy given in electron Volts.

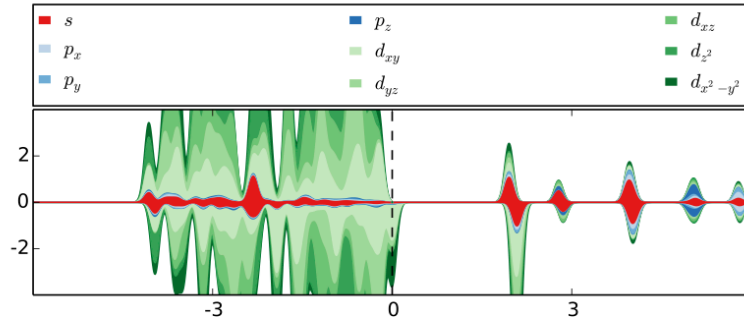

FIG. 67. Projected local density of states for the Pd<sub>7</sub> cluster with a multiplicity of 3 for the PBE0 exchange-correlation functional. The positive values present the projection values for the spin up Kohn-Sham states and the negative values present the projection values for the spin down Kohn-Sham states. The x axis for this plot is the energy of the states relative to the Fermi energy given in electron Volts.

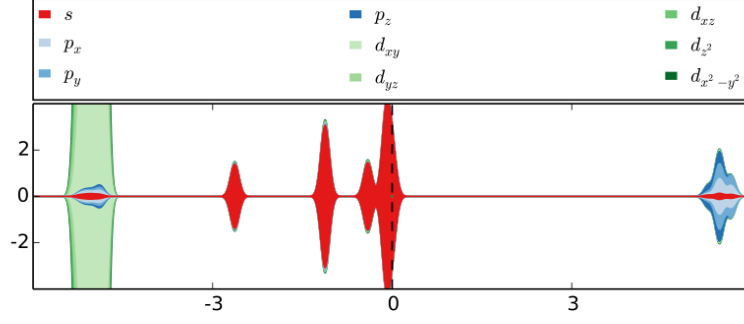

FIG. 68. Projected local density of states for the Hg<sub>7</sub> cluster with a multiplicity of 1 for the PBE0 exchange-correlation functional. The positive values present the projection values for the spin up Kohn-Sham states and the negative values present the projection values for the spin down Kohn-Sham states. The x axis for this plot is the energy of the states relative to the Fermi energy given in electron Volts.

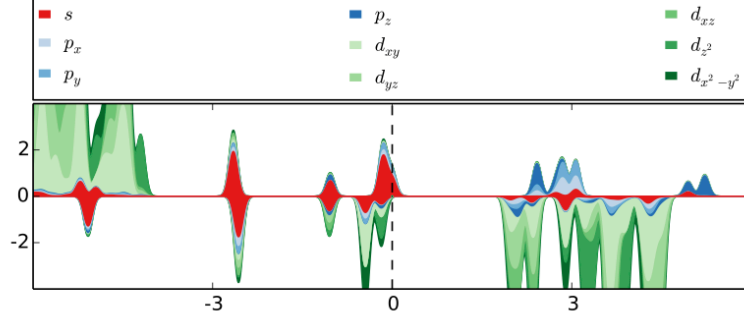

FIG. 69. Projected local density of states for the Mn<sub>7</sub> cluster with a multiplicity of 36 for the PBE0 exchange-correlation functional. The positive values present the projection values for the spin up Kohn-Sham states and the negative values present the projection values for the spin down Kohn-Sham states. The x axis for this plot is the energy of the states relative to the Fermi energy given in electron Volts.

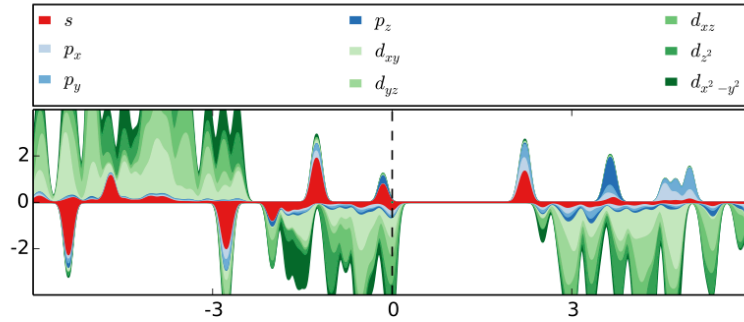

FIG. 70. Projected local density of states for the Fe<sub>7</sub> cluster with a multiplicity of 23 for the PBE0 exchange-correlation functional. The positive values present the projection values for the spin up Kohn-Sham states and the negative values present the projection values for the spin down Kohn-Sham states. The x axis for this plot is the energy of the states relative to the Fermi energy given in electron Volts.

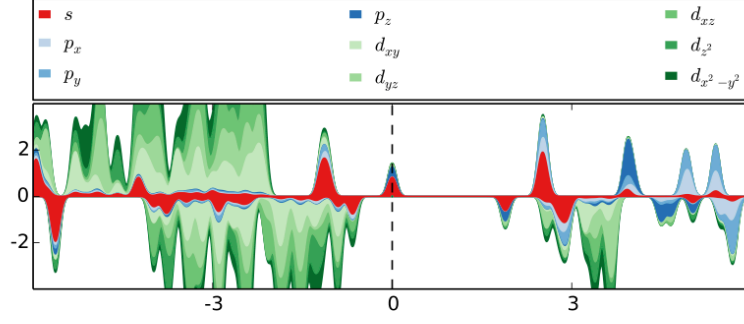

FIG. 71. Projected local density of states for the Ni<sub>7</sub> cluster with a multiplicity of 9 for the PBE0 exchange-correlation functional. The positive values present the projection values for the spin up Kohn-Sham states and the negative values present the projection values for the spin down Kohn-Sham states. The x axis for this plot is the energy of the states relative to the Fermi energy given in electron Volts.

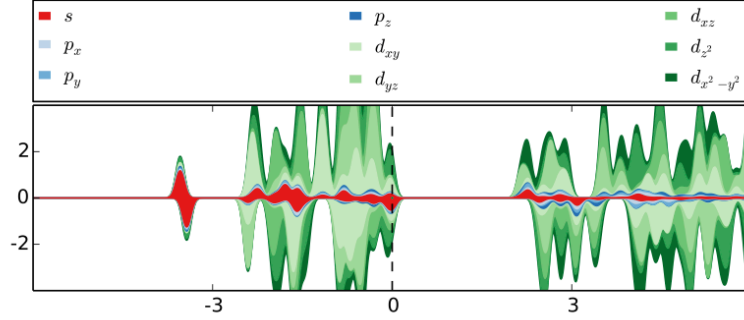

FIG. 72. Projected local density of states for the V<sub>7</sub> cluster with a multiplicity of 6 for the PBE0 exchange-correlation functional. The positive values present the projection values for the spin up Kohn-Sham states and the negative values present the projection values for the spin down Kohn-Sham states. The x axis for this plot is the energy of the states relative to the Fermi energy given in electron Volts.

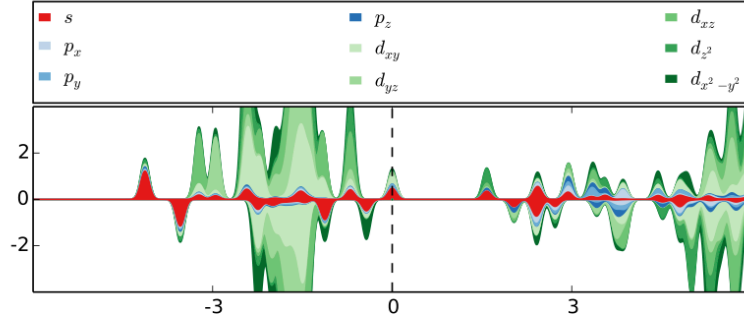

FIG. 73. Projected local density of states for the  $\text{Cr}_7^+$  cluster with a multiplicity of 6 for the PBE0 exchange-correlation functional. The positive values present the projection values for the spin up Kohn-Sham states and the negative values present the projection values for the spin down Kohn-Sham states. The x axis for this plot is the energy of the states relative to the Fermi energy given in electron Volts.

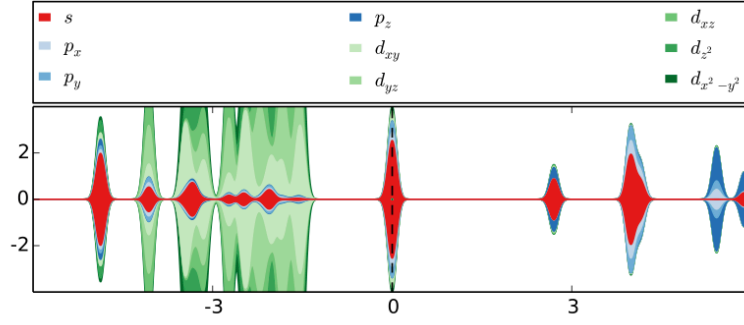

FIG. 74. Projected local density of states for the  $\text{Cu}_7^+$  cluster with a multiplicity of 1 for the PBE0 exchange-correlation functional. The positive values present the projection values for the spin up Kohn-Sham states and the negative values present the projection values for the spin down Kohn-Sham states. The x axis for this plot is the energy of the states relative to the Fermi energy given in electron Volts.

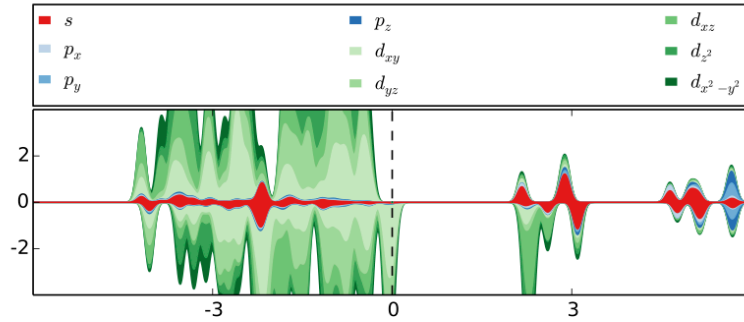

FIG. 75. Projected local density of states for the  $\text{Pd}_7^+$  cluster with a multiplicity of 4 for the PBE0 exchange-correlation functional. The positive values present the projection values for the spin up Kohn-Sham states and the negative values present the projection values for the spin down Kohn-Sham states. The x axis for this plot is the energy of the states relative to the Fermi energy given in electron Volts.

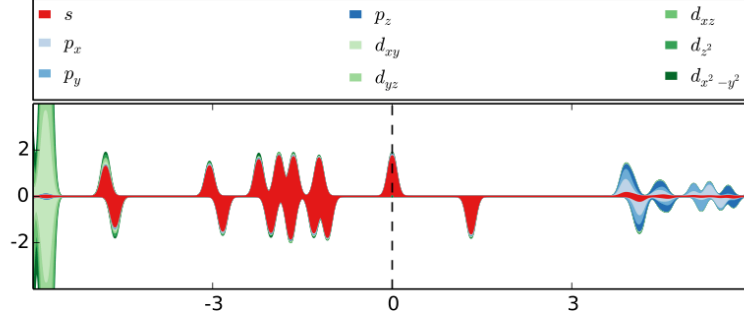

FIG. 76. Projected local density of states for the  $\text{Hg}_7^+$  cluster with a multiplicity of 2 for the PBE0 exchange-correlation functional. The positive values present the projection values for the spin up Kohn-Sham states and the negative values present the projection values for the spin down Kohn-Sham states. The x axis for this plot is the energy of the states relative to the Fermi energy given in electron Volts.

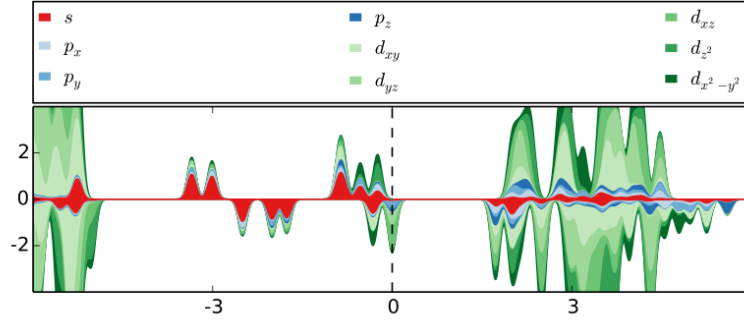

FIG. 77. Projected local density of states for the  $\text{Mn}_7^+$  cluster with a multiplicity of 7 for the PBE0 exchange-correlation functional. The positive values present the projection values for the spin up Kohn-Sham states and the negative values present the projection values for the spin down Kohn-Sham states. The x axis for this plot is the energy of the states relative to the Fermi energy given in electron Volts.

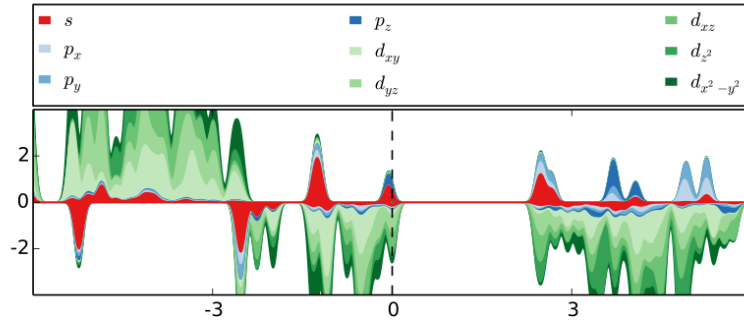

FIG. 78. Projected local density of states for the  $\text{Fe}_7^+$  cluster with a multiplicity of 24 for the PBE0 exchange-correlation functional. The positive values present the projection values for the spin up Kohn-Sham states and the negative values present the projection values for the spin down Kohn-Sham states. The x axis for this plot is the energy of the states relative to the Fermi energy given in electron Volts.

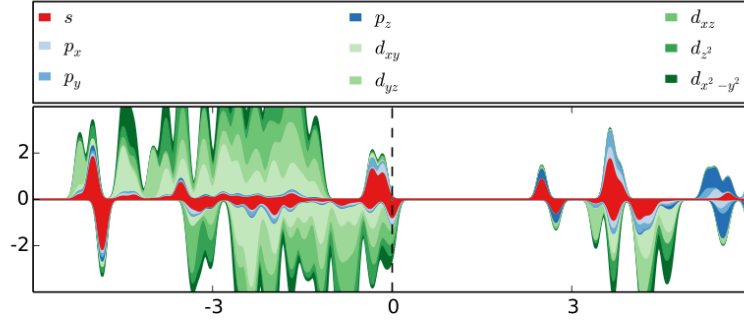

FIG. 79. Projected local density of states for the  $\text{Ni}_7^+$  cluster with a multiplicity of 8 for the PBE0 exchange-correlation functional. The positive values present the projection values for the spin up Kohn-Sham states and the negative values present the projection values for the spin down Kohn-Sham states. The x axis for this plot is the energy of the states relative to the Fermi energy given in electron Volts.

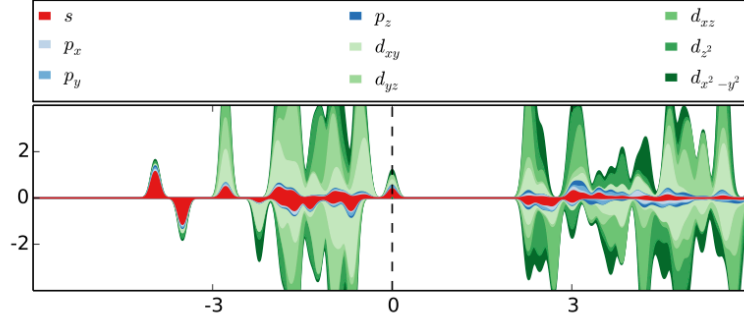

FIG. 80. Projected local density of states for the  $\text{V}_7^+$  cluster with a multiplicity of 5 for the PBE0 exchange-correlation functional. The positive values present the projection values for the spin up Kohn-Sham states and the negative values present the projection values for the spin down Kohn-Sham states. The x axis for this plot is the energy of the states relative to the Fermi energy given in electron Volts.

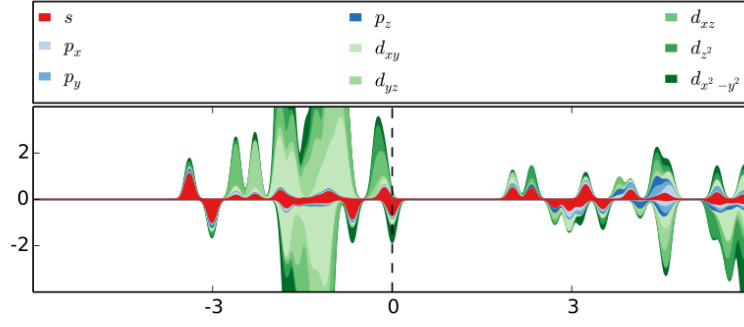

FIG. 81. Projected local density of states for the  $\text{Cr}_7^{2+}$  cluster with a multiplicity of 5 for the PBE0 exchange-correlation functional. The positive values present the projection values for the spin up Kohn-Sham states and the negative values present the projection values for the spin down Kohn-Sham states. The x axis for this plot is the energy of the states relative to the Fermi energy given in electron Volts.

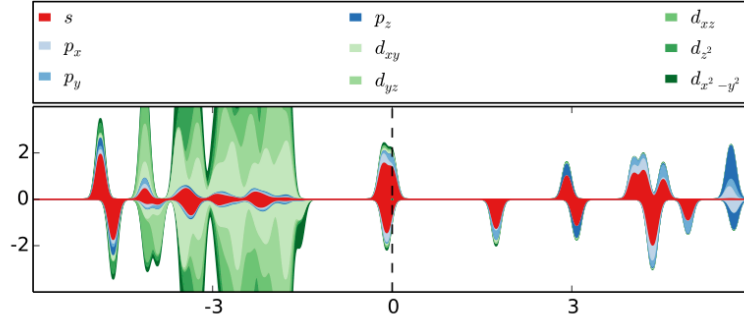

FIG. 82. Projected local density of states for the  $\text{Cu}_7^{2+}$  cluster with a multiplicity of 2 for the PBE0 exchange-correlation functional. The positive values present the projection values for the spin up Kohn-Sham states and the negative values present the projection values for the spin down Kohn-Sham states. The x axis for this plot is the energy of the states relative to the Fermi energy given in electron Volts.

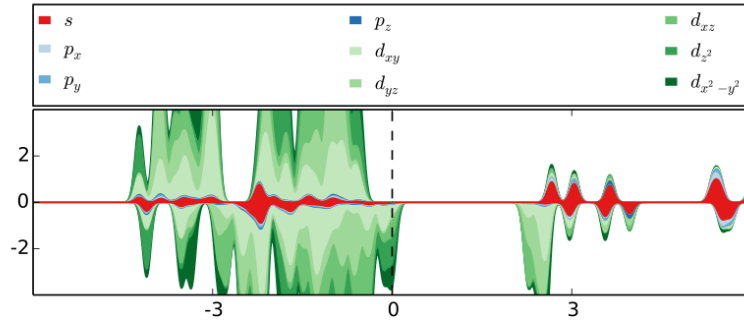

FIG. 83. Projected local density of states for the  $\text{Pd}_7^{2+}$  cluster with a multiplicity of 5 for the PBE0 exchange-correlation functional. The positive values present the projection values for the spin up Kohn-Sham states and the negative values present the projection values for the spin down Kohn-Sham states. The x axis for this plot is the energy of the states relative to the Fermi energy given in electron Volts.



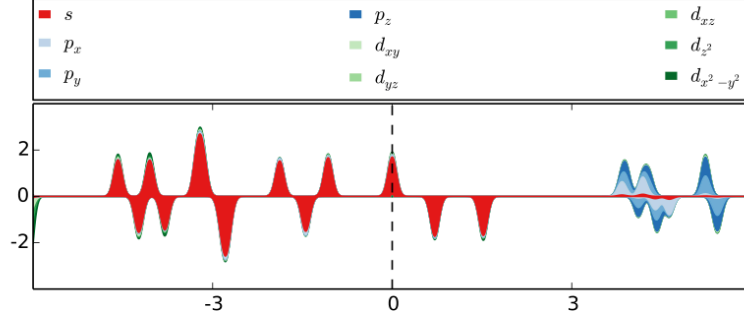

FIG. 84. Projected local density of states for the  $\text{Hg}_7^{2+}$  cluster with a multiplicity of 3 for the PBE0 exchange-correlation functional. The positive values present the projection values for the spin up Kohn-Sham states and the negative values present the projection values for the spin down Kohn-Sham states. The x axis for this plot is the energy of the states relative to the Fermi energy given in electron Volts.

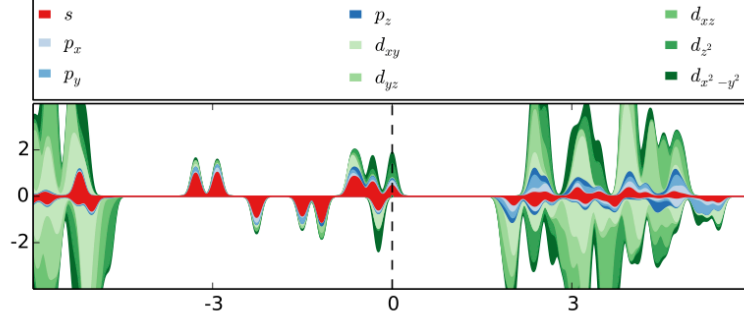

FIG. 85. Projected local density of states for the  $\text{Mn}_7^{2+}$  cluster with a multiplicity of 8 for the PBE0 exchange-correlation functional. The positive values present the projection values for the spin up Kohn-Sham states and the negative values present the projection values for the spin down Kohn-Sham states. The x axis for this plot is the energy of the states relative to the Fermi energy given in electron Volts.

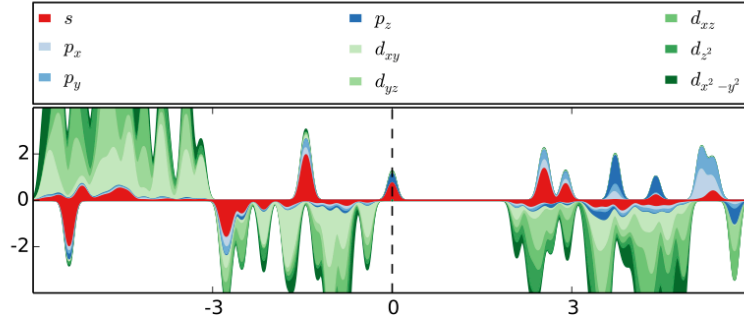

FIG. 86. Projected local density of states for the  $\text{Fe}_7^{2+}$  cluster with a multiplicity of 25 for the PBE0 exchange-correlation functional. The positive values present the projection values for the spin up Kohn-Sham states and the negative values present the projection values for the spin down Kohn-Sham states. The x axis for this plot is the energy of the states relative to the Fermi energy given in electron Volts.

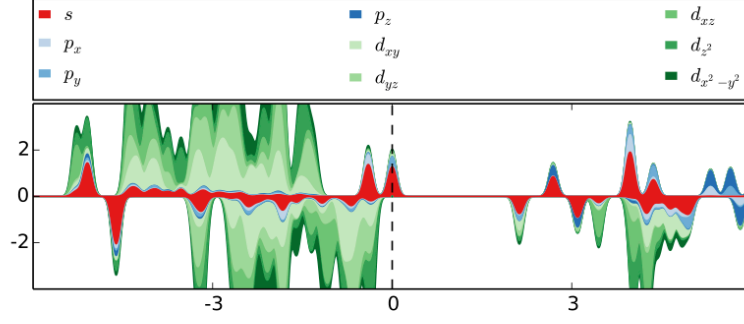

FIG. 87. Projected local density of states for the  $\text{Ni}_7^{2+}$  cluster with a multiplicity of 9 for the PBE0 exchange-correlation functional. The positive values present the projection values for the spin up Kohn-Sham states and the negative values present the projection values for the spin down Kohn-Sham states. The x axis for this plot is the energy of the states relative to the Fermi energy given in electron Volts.

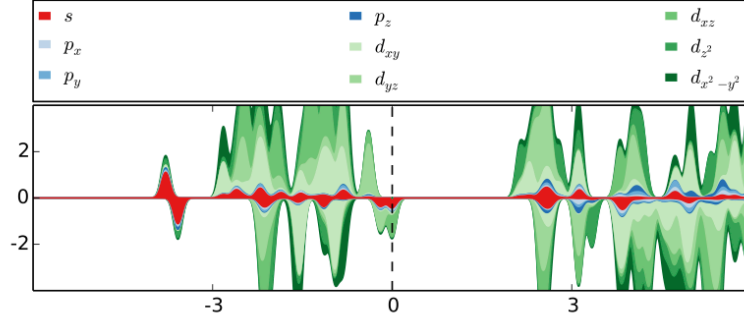

FIG. 88. Projected local density of states for the  $\text{V}_7^{2+}$  cluster with a multiplicity of 12 for the PBE0 exchange-correlation functional. The positive values present the projection values for the spin up Kohn-Sham states and the negative values present the projection values for the spin down Kohn-Sham states. The x axis for this plot is the energy of the states relative to the Fermi energy given in electron Volts.

#### IV. ADIABATIC IONISATION POTENTIAL

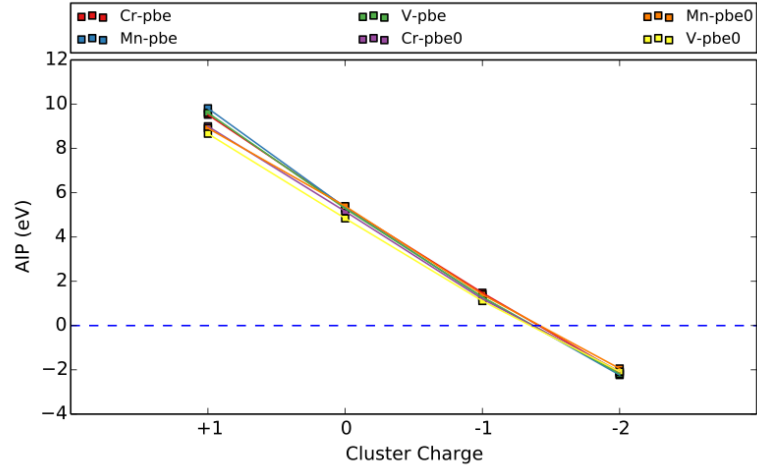

FIG. 89. Adiabatic ionisation potential for the  $A_7^C$  ( $A = \text{Cr, Mn, V}$ ;  $C = 0, \pm 1, \pm 2$ ) clusters.

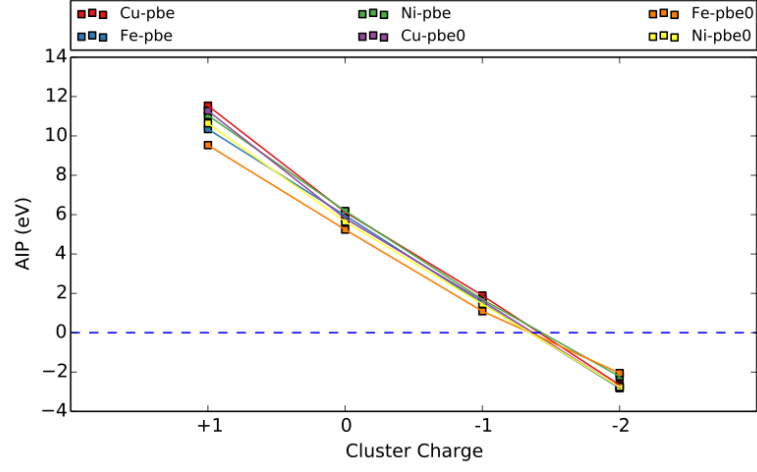

FIG. 90. Adiabatic ionisation potential for the  $A_7^C$  ( $A = \text{Fe, Cu, Ni}$ ;  $C = 0, \pm 1, \pm 2$ ) clusters.

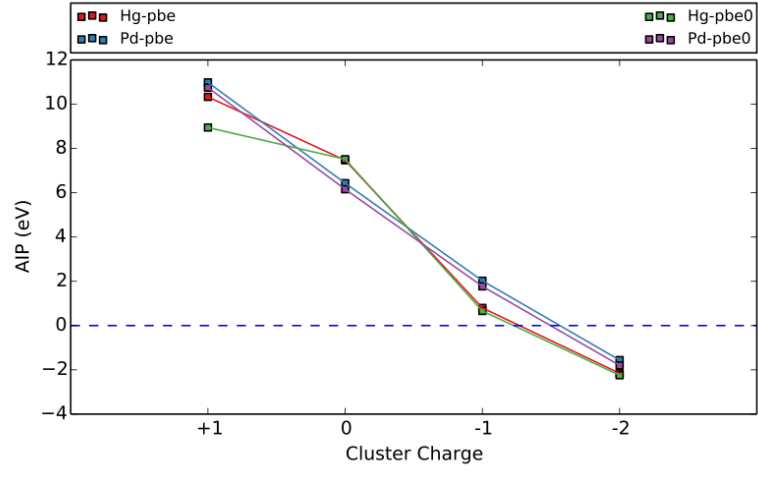

FIG. 91. Adiabatic ionisation potential for the  $A_7^C$  ( $A = \text{Hg, Pd}$ ;  $C = 0, \pm 1, \pm 2$ ) clusters.

## V. ASSIGNED SUPERATOMIC OCCUPANCIES

TABLE I. Assigned superatomic population for the  $\text{Cr}_7^c$  ( $c = 0, \pm 1, \pm 2$ ) clusters for the PBE and PBE0 calculations. These assignments are based off analysis of the PDOS weighting factors, PLDOS and direct visualisation of the Kohn-Sham states.

| $\text{Cr}_7^c$ |                  |                  |
|-----------------|------------------|------------------|
|                 | <i>PBE</i>       | <i>PBE0</i>      |
| -2              | $1S^2 1P^6 1D^1$ | $1S^2 1P^6 1D^1$ |
| -1              | $1S^2 1P^6$      | $1S^2 1P^6$      |
| 0               | $1S^2 1P^5$      | $1S^2 1P^5$      |
| +1              | $1S^2 1P^4$      | $1S^2 1P^4$      |
| +2              | $1S^2 1P^3$      | $1S^2 1P^3$      |

TABLE II. Assigned superatomic population for the  $\text{Cu}_7^c$  ( $c = 0, \pm 1, \pm 2$ ) clusters for the PBE and PBE0 calculations. These assignments are based off analysis of the PDOS weighting factors, PLDOS and direct visualisation of the Kohn-Sham states.

| $\text{Cu}_7^c$ |                  |                  |
|-----------------|------------------|------------------|
|                 | <i>PBE</i>       | <i>PBE0</i>      |
| -2              | $1S^2 1P^6 1D^1$ | $1S^2 1P^6 1D^1$ |
| -1              | $1S^2 1P^6$      | $1S^2 1P^6$      |
| 0               | $1S^2 1P^5$      | $1S^2 1P^5$      |
| +1              | $1S^2 1P^4$      | $1S^2 1P^4$      |
| +2              | $1S^2 1P^3$      | $1S^2 1P^3$      |

TABLE IV. Assigned superatomic population for the  $\text{Hg}_7^c$  ( $c = 0, \pm 1, \pm 2$ ) clusters for the PBE and PBE0 calculations. These assignments are based off analysis of the PDOS weighting factors, PLDOS and direct visualisation of the Kohn-Sham states.

| $\text{Hg}_7^c$ |                       |                       |
|-----------------|-----------------------|-----------------------|
|                 | <i>PBE</i>            | <i>PBE0</i>           |
| -2              | $1S^2 1P^6 1D^6 2S^2$ | $1S^2 1P^6 1D^6 2S^2$ |
| -1              | $1S^2 1P^6 1D^6 2S^1$ | $1S^2 1P^6 1D^6 2S^1$ |
| 0               | $1S^2 1P^6 1D^6$      | $1S^2 1P^6 1D^6$      |
| +1              | $1S^2 1P^6 1D^4$      | $1S^2 1P^6 1D^4$      |
| +2              | $1S^2 1P^4 1D^4 1P^2$ |                       |

TABLE III. Assigned superatomic population for the  $\text{Pd}_7^c$  ( $c = 0, \pm 1, \pm 2$ ) clusters for the PBE and PBE0 calculations. These assignments are based off analysis of the PDOS weighting factors, PLDOS and direct visualisation of the Kohn-Sham states.

| $\text{Pd}_7^c$ |             |             |
|-----------------|-------------|-------------|
|                 | <i>PBE</i>  | <i>PBE0</i> |
| -2              | $1S^2 1P^2$ | $1S^2 1P^2$ |
| -1              | $1S^2 1P^2$ | $1S^2 1P^2$ |
| 0               | $1S^2$      | $1S^2$      |
| +1              | $1S^2$      | $1S^2$      |
| +2              | $1S^2$      | $1S^2$      |

TABLE V. Assigned superatomic population for the  $\text{Mn}_7^c$  ( $c = 0, \pm 1, \pm 2$ ) clusters for the PBE and PBE0 calculations. These assignments are based off analysis of the PDOS weighting factors, PLDOS and direct visualisation of the Kohn-Sham states.

| $\text{Mn}_7^c$ |                  |                            |
|-----------------|------------------|----------------------------|
|                 | <i>PBE</i>       | <i>PBE0</i>                |
| -2              | $1S^2 1P^6 1D^2$ | $1S^2 1P^6 1D^4 2S^2 2P^2$ |
| -1              | $1S^2 1P^6 1D^3$ | $1S^2 1P^6 1D^4 2S^2 2P^1$ |
| 0               | $1S^2 1P^6 1D^4$ | $1S^2 1P^6 1D^4 2S^2$      |
| +1              | $1S^2 1P^6 1D^3$ | $1S^2 1P^6 1D^5 2S^1$      |
| +2              | $1S^2 1P^5$      | $1S^2 1P^6 1D^3 2S^1$      |

TABLE VI. Assigned superatomic population for the  $\text{Fe}_7^c$  ( $c = 0, \pm 1, \pm 2$ ) clusters for the PBE and PBE0 calculations. These assignments are based off analysis of the PDOS weighting factors, PLDOS and direct visualisation of the Kohn-Sham states.

| $\text{Fe}_7^c$ |             |                       |
|-----------------|-------------|-----------------------|
|                 | <i>PBE</i>  | <i>PBE0</i>           |
| -2              | $1S^2 1P^6$ | $1S^2 1P^6 1D^2 2S^1$ |
| -1              | $1S^2 1P^6$ | $1S^2 1P^6 1D^1 2S^1$ |
| 0               | $1S^2 1P^6$ | $1S^2 1P^6$           |
| +1              | $1S^2 1P^6$ | $1S^2 1P^6$           |
| +2              | $1S^2 1P^5$ | $1S^2 1P^6$           |

TABLE VII. Assigned superatomic population for the  $\text{Ni}_7^c$  ( $c = 0, \pm 1, \pm 2$ ) clusters for the PBE and PBE0 calculations. These assignments are based off analysis of the PDOS weighting factors, PLDOS and direct visualisation of the Kohn-Sham states.

| $\text{Ni}_7^c$ |             |             |
|-----------------|-------------|-------------|
|                 | <i>PBE</i>  | <i>PBE0</i> |
| -2              | $1S^2 1P^6$ | $1S^2 1P^6$ |
| -1              | $1S^2 1P^5$ | $1S^2 1P^6$ |
| 0               | $1S^2 1P^4$ | $1S^2 1P^5$ |
| +1              | $1S^2 1P^2$ | $1S^2 1P^4$ |
| +2              | $1S^2 1P^2$ | $1S^2 1P^3$ |

TABLE VIII. Assigned superatomic population for the  $\text{V}_7^c$  ( $c = 0, \pm 1, \pm 2$ ) clusters for the PBE and PBE0 calculations. These assignments are based off analysis of the PDOS weighting factors, PLDOS and direct visualisation of the Kohn-Sham states.

| $\text{V}_7^c$ |                  |                  |
|----------------|------------------|------------------|
|                | <i>PBE</i>       | <i>PBE0</i>      |
| -2             | $1S^2 2S^2 1P^5$ | $1S^2 1P^6 1D^1$ |
| -1             | $1S^2 2S^2 1P^4$ | $1S^2 1P^6$      |
| 0              | $1S^2 2S^2 1P^4$ | $1S^2 1P^5$      |
| +1             | $1S^2 2S^2 1P^4$ | $1S^2 1P^4$      |
| +2             | $1S^2 2S^2 1P^4$ | $1S^2 1P^3$      |
